1 **Umbilical cord blood-derived ILC1-like cells constitute a novel precursor for mature**  
2 **KIR<sup>+</sup>NKG2A<sup>-</sup> NK cells**

3  
4 Sabrina Bianca Bennstein<sup>1</sup>, Sandra Weinhold<sup>1</sup>, Angela Ricarda Manser<sup>1</sup>, Nadine  
5 Scherenschlich<sup>1</sup>, Angela Noll<sup>2</sup>, Katharina Raba<sup>1</sup>, Gesine Kögler<sup>1</sup>, Lutz Walter<sup>2</sup>, Markus  
6 Uhrberg<sup>1\*</sup>

7  
8 <sup>1</sup>Institute for Transplantation Diagnostics and Cell Therapeutics, Medical Faculty, Heinrich-  
9 Heine University Düsseldorf, Moorenstr. 5, 40225, Düsseldorf, Germany.

10 <sup>2</sup>Primate Genetics Laboratory, German Primate Center, Leibnitz-Institute for Primate  
11 Research, Göttingen, Germany

12  
13  
14 \*Corresponding author: Markus Uhrberg [markus.uhrberg@med.uni-duesseldorf.de](mailto:markus.uhrberg@med.uni-duesseldorf.de)

15  
16  
17 **Abstract**

18 Despite their identification several years ago, molecular identity and developmental relation  
19 between human ILC1 and NK cells, comprising group 1 ILCs, is still elusive. To unravel their  
20 connection, thorough transcriptional, epigenetic, and functional characterization was performed  
21 from umbilical cord blood (CB). Unexpectedly, ILC1-like cells lacked Tbet expression and  
22 failed to produce IFN $\gamma$ . Moreover, in contrast to previously described ILC1 subsets they could  
23 be efficiently differentiated into NK cells. These were characterized by highly diversified KIR  
24 repertoires including late stage NKG2A-KIR<sup>+</sup> effector cells that are commonly not generated  
25 from previously known NK cell progenitor sources. This property was dependent on stroma  
26 cell-derived Notch ligands. The frequency of the novel ILC1-like NK cell progenitor (NKP)  
27 significantly declined in CB from early to late gestational age. The study supports a model in  
28 which circulating fetal ILC1-like NKPs travel to secondary lymphoid tissues to initiate the  
29 formation of diversified NK cell repertoires after birth.

30  
31  
32  
33  
34  
35  
36  
37  
38  
39  
40  
41  
42  
43  
44  
45  
46  
47  
48

## 49 Introduction

50 Innate lymphoid cells (ILC) constitute a novel family of non-B, non-T cell lymphocytes that  
51 was established within the last decade (Spits et al., 2013; Vivier et al., 2018). The ILC  
52 nomenclature mirrors previously established T cell effector definitions and can be divided into  
53 three functional groups: natural killer (NK) cells and ILC1 are grouped within group 1 ILCs  
54 due to their expression of the transcription factor (TF) T-bet and secretion of IFN $\gamma$  (Bernink et  
55 al., 2013; Spits et al., 2013); ILC2 belong into ILC group 2 and produce T<sub>H</sub>2-like cytokines as  
56 well as express the TF GATA-3 (Mjösberg et al., 2011); ILC3 as well as fetal lymphoid tissue  
57 inducer cells belong into group 3 ILC, they secrete IL-17 and/or IL-22 and depend on TF ROR $\gamma$ t  
58 expression (Hoorweg et al., 2012). In humans, non-NK ILCs are conventionally defined and  
59 physically enriched on the basis of IL-7 receptor expression (CD127) in combination with the  
60 exclusion of a lineage marker panel (Bennstein et al., 2019; Krabbendam et al., 2018; Spits et  
61 al., 2013; Vivier et al., 2018). Further differentiation into ILC subgroups involves the presence  
62 of CD117 on ILC3, of CRTH2 on ILC2, and the lack of both in case of ILC1.

63  
64 The transcriptional and functional identity of ILC1 in humans is still a matter of debate, which  
65 is partly due to the fact that in contrast to other ILC subsets, ILC1 are lacking robust markers  
66 enabling their positive identification and isolation. Within the original description, ILC1 were  
67 defined as lin<sup>-</sup>CD127<sup>+</sup>CD117<sup>-</sup>CRTH2<sup>-</sup>CD161<sup>+</sup> cells (Bernink et al., 2013). However, CD161 is  
68 also an NK cell ‘marker’ and CD127 is consistently expressed on the CD56<sup>bright</sup> NK cell  
69 subset (Vivier et al., 2018). Nonetheless, ILC1 can be robustly separated from NK cells in most  
70 settings by the lack of the CD94/NKG2A heterodimer and/or KIR, representing the prime  
71 receptors for missing self-recognition, thereby constituting an exclusive phenotypic and  
72 functional hallmark of NK cells (Bernink et al., 2013; Manser et al., 2015). In addition to the  
73 original described ILC1 subset, an intraepithelial CD103<sup>+</sup>Eomes<sup>+</sup> type 1 ILC has been  
74 described expressing T-bet and secreting IFN $\gamma$  (Cella et al., 2019; Fuchs et al., 2013). Of note,  
75 the intraepithelial CD103<sup>+</sup> subset expresses typical NK cell markers such as CD94, NKG2A,  
76 and granzymes (Cella et al., 2019; Krämer et al., 2017). Since CD103 is an established tissue  
77 residency marker frequently found on NK cells within mucosa-associated lymphoid  
78 tissues (Freud et al., 2017) and moreover transcriptional as well as phenotypic analysis failed to  
79 clearly separate CD103<sup>+</sup> intraepithelial ILC1 from NK cells (Cella et al., 2019; Yudanin et al.,  
80 2019), the CD103<sup>+</sup> intraepithelial subset appears to be a tissue-resident NK cell subset.

81  
82 Regarding the developmental relationship between human NK cells and ILC1, recent data  
83 support the existence of separate precursors for the development of ILC1 and NK cells  
84 downstream of the common lymphoid progenitor stage (Renoux et al., 2015; Vivier et al., 2018),  
85 which is a revision of the initial model assuming a direct common progenitor of ILC1 and NK  
86 cells (Spits et al., 2013). Nevertheless, the question remains what relationship the two human  
87 type 1 ILC types have to one another. Several studies in mice suggest a conversion of NK cells  
88 into ILC1 (Cortez et al., 2017; Park et al., 2019). In contrast, it is currently not known if ILC1  
89 can be converted into NK cells, except by reprogramming of murine ILC1 with Eomes, a central  
90 TF for NK cell development and maturation (Pikovskaya et al., 2016). Notably, plasticity  
91 between NK and ILC1s has so far not been shown in humans.

92

93 So far, definitions of ILC1 are predominantly based on work in solid organs and tissues such  
94 as gut and lymph nodes(Bernink et al., 2013; Bjorklund et al., 2016). In contrast, for circulating  
95 ILC1, information on origin, function, and developmental potential is still at its infancy. Given  
96 that the accessibility of ILCs in humans is mostly restricted to blood, an increased  
97 understanding of the biology of blood-borne ILC and their respective progenitors appears to be  
98 of pivotal importance for guiding and implementing future ILC-based cellular therapies. Of  
99 note, in PB it was recently shown that  $\text{lin}^- \text{CD117}^+$  cells, phenotypically resembling ILC3, were  
100 observed to be functionally immature but instead could be differentiated into all ILC subsets  
101 including NK cells(Lim et al., 2017).

102

103 In the present study, a thorough characterization of circulating type 1 ILC was performed in  
104 human umbilical cord blood (CB). CB represents a highly versatile and ethically non-  
105 problematic source of neonatal blood with low pathogenic burden that was recently shown to  
106 be enriched for ILCs compared to PB(Vely et al., 2016). Our work demonstrates that CB-  
107 derived ILC1-like cells are distinct from NK cells on the transcriptional, epigenetic, and  
108 functional level but rather constitute NK cell progenitors (NKP) with a unique propensity to  
109 generate clonally diversified NK cell repertoires in vitro. A similar ILC1-like subset, albeit at  
110 lower frequency, was also found in peripheral blood.

111

## 112 **Results**

113

### 114 **Distinct transcriptional identities of neonatal circulating ILC1-like cells and NK cells**

115 The transcriptional basis underlying the phenotypic and functional differences between NK  
116 cells and ILC1, together comprising the group 1 ILC family, is poorly defined in the circulation  
117 and direct comparisons between ILC1 and NK cells by bulk RNA sequencing are so far not  
118 available. A central purpose of the present study was to characterize group 1 ILC in CB, which  
119 provides a rich source for ILCs comprising all three ILC subsets as well as both major NK cell  
120 subsets, the regulatory  $\text{CD56}^{\text{bright}}$  and the cytotoxic  $\text{CD56}^{\text{dim}}$  NK cells(Bennstein et al., 2019).  
121 To this end, ILC1-like cells, defined as  $\text{lin}^- \text{CD94}^- \text{CD127}^+ \text{CRTH2}^- \text{CD117}^-$  cells,  $\text{CD56}^{\text{bright}}$  NK  
122 cells, and  $\text{CD56}^{\text{dim}}$  NK cells were flow cytometrically sorted from freshly collected CB and  
123 subjected to RNAseq analysis (Fig. S1). All three group 1 ILC subsets could be clearly  
124 separated from each other on the basis of their transcriptional patterns in the heatmap and  
125 principal component analysis (Fig. 1a, b). PC1, which accounts for 56% variance in the data,  
126 differentiates between the three cell subsets with ILC1-like cells clearly separated from  
127  $\text{CD56}^{\text{dim}}$  NK cells and  $\text{CD56}^{\text{bright}}$  NK cells. Within PC2 accounting for 16% of variance, all  
128 three subsets could be further separated from each other with ILC1-like cells being more similar  
129 to  $\text{CD56}^{\text{dim}}$  NK cells than  $\text{CD56}^{\text{bright}}$  NK cells.

130

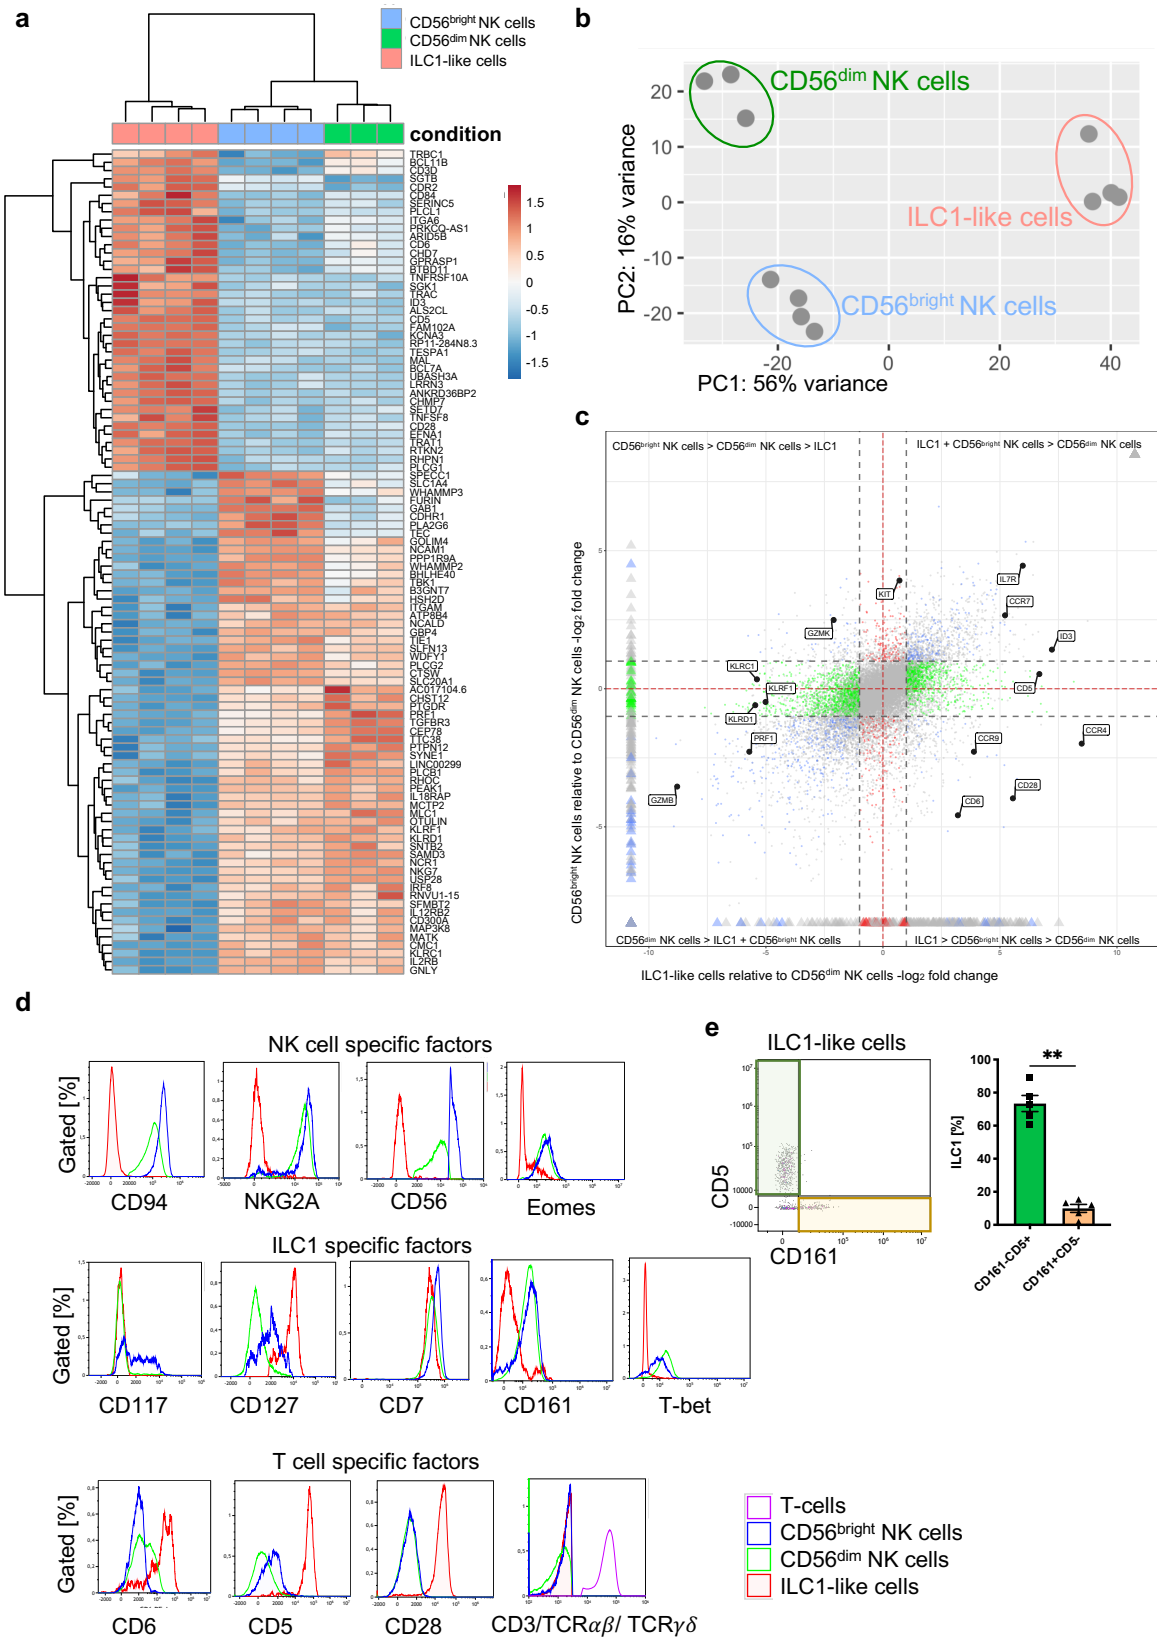

131  
132  
133  
134  
135

**Figure 1 | ILC1-like cells have a unique gene signature distinct from NK cells.** (a) CB mononuclear cells (MNCs) were enriched prior to sorting via biotin-labelled antibodies (anti-CD3/CD19/CD14/CD66b) and sorted for ILC1-like cells, CD56<sup>dim</sup>, and CD56<sup>bright</sup> NK cells (see Fig. S1 for sorting strategy). RNA sequencing was done on the Illumina platform. The heat map indicates the

136 top 100 differentially expressed genes between ILC1-like cells and CD56<sup>bright</sup> NK cells including  
137 CD56<sup>dim</sup> NK cells. **(b)** A two-dimensional principle component analyses based on the top 2000  
138 differentially transcribed genes of CD56<sup>bright</sup> NK cells, CD56<sup>dim</sup> NK cells, and ILC1-like cells is shown.  
139 **(c)** A four-way plot with a cut off at a log<sub>2</sub> fold change  $\pm$  1 (dotted lines) and adjusted p-values of 0.05  
140 showing differently expressed genes of CB CD56<sup>bright</sup> NK cells compared to CD56<sup>dim</sup> NK cells and  
141 ILC1-like cells. Blue dots represent genes with an adjusted p-value  $<$  0.05 with a fold change  $>$  1. Green  
142 dots represent genes with an adjusted p-value  $<$  0.05 with a fold change between  $>$ 1 (x-axis) and  $<$  1 (y-  
143 axis). Grey dots represent genes with an adjusted p-value  $>$  0.05. Red dots represent genes with an  
144 adjusted p-value  $<$  0.05 with fold rates  $<$  1 (x-axis) and  $>$  1 (y-axis). Selected genes differentially  
145 expressed between NK cells subsets and ILC1-like cells are highlighted. **(d)** CB MNCs (n=3) gated on  
146 ILC1-like cells, CD56<sup>bright</sup> NK cells, and CD56<sup>dim</sup> NK cells, respectively were analyzed by flow  
147 cytometry for selected NK, T, and ILC markers. Representative histograms for NK cell specific factors  
148 containing CD94, NKG2A, CD56, and EOMES (upper panel), ILC1 specific factors containing CD117,  
149 CD127, CD7, CD161, and TBET (middle panel), and T cell specific factors CD6, CD5, CD28, as well  
150 as a Mix of CD3/TCR $\alpha\beta$ /TCR $\gamma\delta$  (bottom panel). **(e)** Representative dot plot of the expression of CD5  
151 and CD161 within CB ILC1-like cells with representative quantification of CD5<sup>+</sup> (green bar and box)  
152 and CD161<sup>+</sup> (yellow bar and box), (n=5). The height of the bar represents the mean  $\pm$  SEM. Levels of  
153 significance were calculated with a non-parametric t test (Mann-Whitney), \*\* p-value  $<$  0.01. Data  
154 represents at least three different donors and experiments.  
155

156 When analyzing the most differentially expressed genes (Fig. 1a, c-d), ILC1-like cells were  
157 distinguished from NK cells by the lack of expression of typical NK cell markers such as CD56  
158 (*NCAM1*), NKp46 (*NCR1*), NKp80 (*KLRF1*), NKG2A (*KLRC1*), and CD94 (*KLRD1*), low  
159 expression of receptor subunits for key innate cytokines IL-2 (*IL2RB*), IL-12 (*IL12RB2*), and  
160 IL-18 (*IL18RAP*), as well as lack of cytotoxic effector molecules perforin (*PRF1*), granzysin  
161 (*GNLY*), and all five members of the granzyme family. Whereas ILC1-like cells were  
162 apparently lacking basic NK cell characteristics, several of the most highly expressed genes  
163 within ILC1-like cells turned out to encode proteins associated with the T cell lineage including  
164 T cell surface markers CD5, CD6, and CD28 (Fig.1a, c-d). Furthermore, specific components  
165 of the T-cell receptor (TCR) unit such as TCRB constant chain (*TRBC1*) and CD3 $\delta$  (*CD3D*)  
166 were more strongly transcribed in ILC1-like cells, albeit moderate transcription was also  
167 present in NK cells, particularly the more mature CD56<sup>dim</sup> subset (Fig. 1a). Nevertheless, ILC1-  
168 like cells lacked surface expression of CD3, TCR $\alpha\beta$ , and TCR $\gamma\delta$  (Fig. 1d). On the basis of  
169 CD161 that has been previously described to be expressed on tonsillar ILC1 (Bernink et al.,  
170 2013) and the T cell marker CD5, ILC1-like cells could be further subdivided into two main  
171 subsets, a major CD5<sup>+</sup>CD161<sup>-</sup> subset co-expressing other T cell lineage markers such as CD6  
172 and CD28 and a minor CD5<sup>+</sup>CD161<sup>+</sup> population lacking these T cell markers (Fig. 1e and S2).  
173

174 We next analyzed the expression of lineage-determining transcription factors. Inhibitor of DNA  
175 binding 3 (*ID3*), a helix-loop-helix (HLH) protein that is generally expressed in the T cell but  
176 not NK cell lineage was found to be highly transcribed in ILC1-like cells but not NK cells,  
177 again pointing towards a closer relationship of ILC1-like cells to T cells (Fig. 1a, c).  
178 Furthermore, Eomesodermin (*Eomes*) encoding a key transcription factor for NK cell  
179 development, was highly expressed in NK cells, but also found to be moderately expressed in  
180 ILC1-like cells by RNAseq analysis and also by intranuclear staining (Fig. 1d, Fig. S3). Finally,  
181 TBET (*TBX21*), originally reported to be a defining feature of both, ILC1 and NK cells, was  
182 strongly expressed on EOMES<sup>+</sup> NK cells, whereas it was almost absent on ILC1-like cells (Fig.  
183 1d, Figure S3). Together, we show that neonatal circulating ILC1-like cells have a unique

184 transcriptional identity distinct from NK cells and on the other hand exhibiting phenotypic  
185 similarities with T cells including expression of lineage markers, TCR components, and  
186 transcription factors.

187

188 **Expression of chemotactic receptors suggests differential migratory behavior of ILC1-**  
189 **like subsets and NK cells**

190 Among the most significant changes identified by transcriptional analysis between ILC1-like  
191 and NK cells were the chemokine receptors *CCR7*, which plays a key role in promoting  
192 migration to secondary lymphoid organs, as well as *CCR4* and *CCR9* which are involved in  
193 migration to skin and small intestine, respectively(Oo and Adams, 2010) (Fig. 1c and 2a). All  
194 three receptors were prominently expressed in ILC1-like cells but lacking or weakly expressed  
195 in CD56<sup>dim</sup> and CD56<sup>bright</sup> NK cells, respectively. The chemokine receptor pattern of the ILC1-  
196 like subset was reminiscent of peripheral T cells and suggests fundamentally different  
197 migratory properties of ILC1-like cells under steady-state conditions compared to circulating  
198 NK cells. In contrast, NK cells but not ILC1-like cells exhibited high levels of the Sphingosine-  
199 1 phosphate (S1P) receptor *S1PR5*, which is a potent chemotactic regulator of tissue residency  
200 (Fig. 2a) suggesting that circulating neonatal NK cells, in particular CD56<sup>dim</sup> cells, are more  
201 bound to stay within the circulation compared to ILC1-like cells.

202

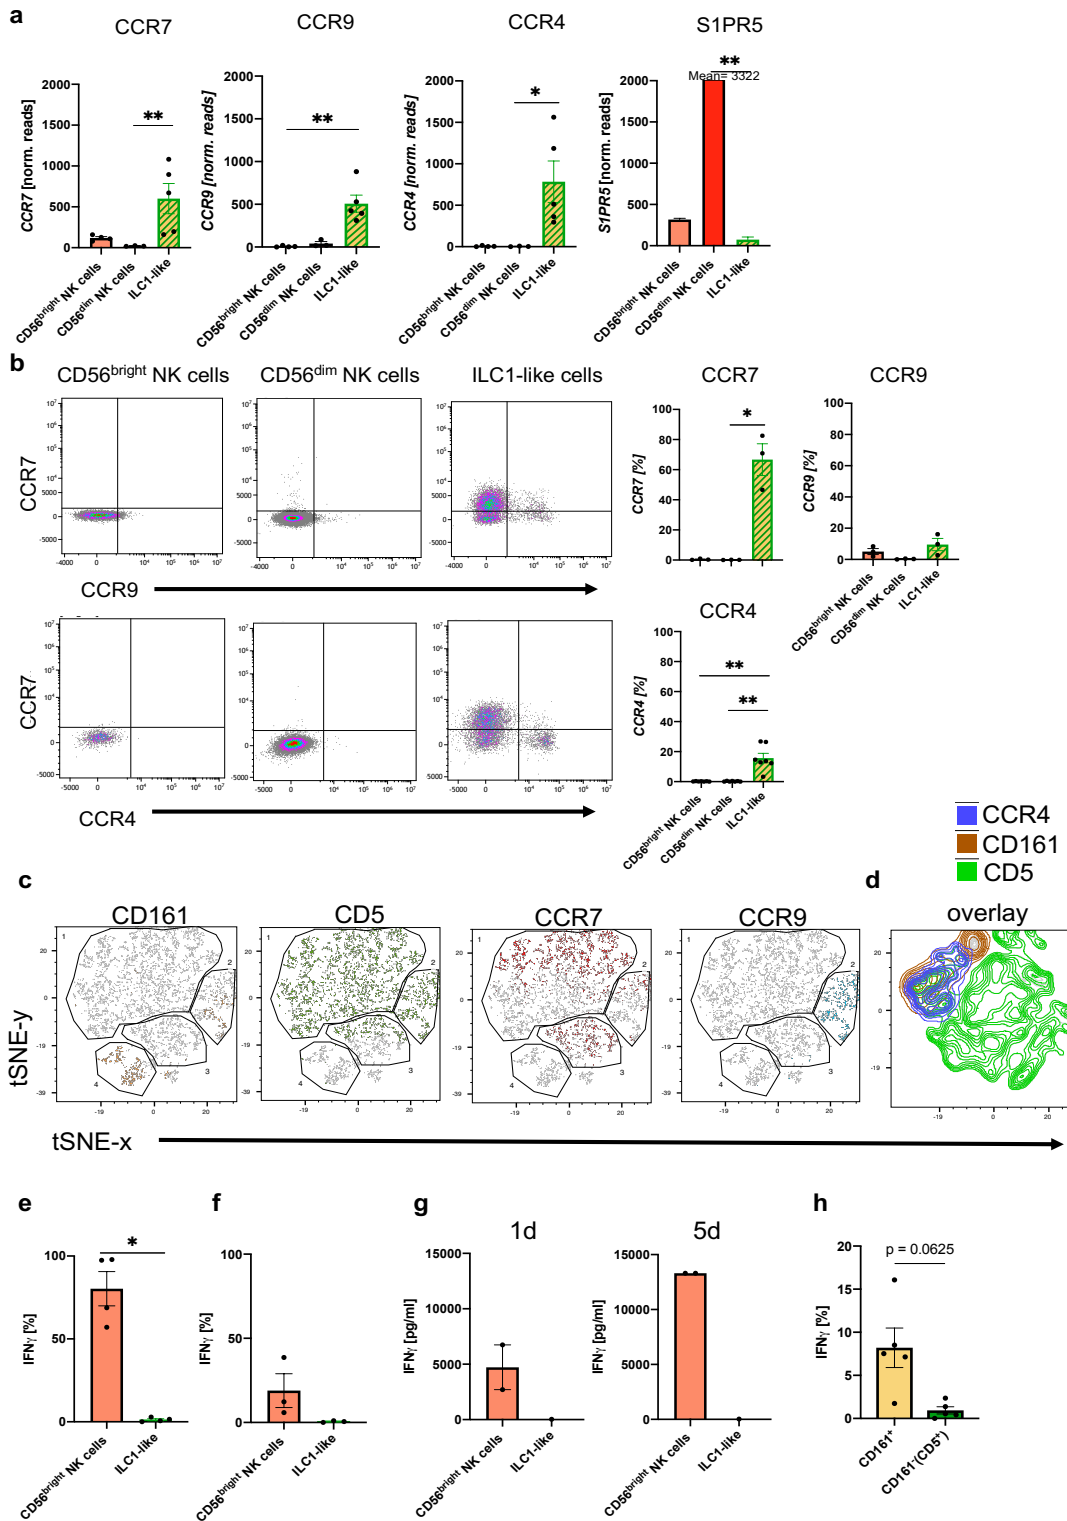

203  
204  
205  
206  
207  
208  
209  
210  
211  
212

**Figure 2 | CD5<sup>+</sup> and CD161<sup>+</sup> ILC1-like subsets are distinguished by differential chemokine receptor expression and functionality. (a)** Expression of CCR7 (left corner), CCR9 (left middle), CCR4 (right middle), and S1PR5 (right corner) determined by RNA sequencing for CD56<sup>bright</sup> NK cells (n=4), CD56<sup>dim</sup> NK cells (n=3), and ILC1-like cells (n=5). **(b)** Surface expression of chemokine receptors on CD56<sup>bright</sup> NK cells, CD56<sup>dim</sup> NK cells, and ILC1-like cells in *ex vivo* isolated MNC from CB. Representative dot plots and quantification of CCR7 and CCR9 (n=3) or CCR7 and CCR4 (n=7) is shown. **(c and d)** t-SNE plots for expression of CD161, CD5, CCR7, and CCR9 as well as an overlay of CD161, CD5, and CCR4 expression (rightmost panel) on ILC1-like cells (n=3) calculated with 500 iterations (see Fig. S1 for gating of ILC1-like cells). **(e and f)** Freshly isolated CB MNC were either

213 stimulated with IL-12 (5ng/ml) and IL-18 (50ng/ml) overnight or with PMA/ Ionomycin for 4 hours to  
214 measure intracellular expression (n=5/3). **(g)** CB ILC1-like cells were sorted and stimulated with IL-  
215 12/IL-18. At day 1 and 5 supernatant was taken and analysed for IFN $\gamma$  secretion (n=1-2). **(h)** MNCs  
216 stimulated with IL-12/IL-18 were further gated on CD161<sup>-</sup> and CD161<sup>+</sup> cells and IFN $\gamma$  secretion was  
217 determined. The heights of the bars represent the mean  $\pm$  SEM. Levels of significance were calculated  
218 with a One-Way ANOVA with a multiple correction post-test (Kruskal-Wallis test) **(a and b)**, by a  
219 Mann-Whitney test **(e-g)** and Wilcoxon ranked test **(h)**, \* p-value < 0.05, \*\* p-value < 0.01, \*\*\* p-value  
220 < 0.001. Data represents at least three different donors and two experiments.

221  
222 In accordance with the RNAseq data (Fig. 1c), CCR7 was highly expressed on the cell surface  
223 of ILC1-like cells but barely detectable on NK cells (Fig. 2b). In case of CCR9, high surface  
224 expression was found on small subsets of CCR7<sup>+</sup> and CCR7<sup>-</sup> ILC1-like cells (12.97% vs 8.74%)  
225 but not NK cells. We further observed a distinct CCR4<sup>+</sup>ILC1-like subset (15.72%), but no  
226 CCR4 expression on NK cells (Fig. 2b). Further analysis of the distribution of chemokine  
227 receptors on the subsets defined by CD5 and CD161 expression shown above (Fig. 1e) by t-  
228 distributed stochastic neighbor embedding (t-SNE) analysis revealed that CCR4, CCR7 and  
229 CCR9 expression was restricted to CD5<sup>+</sup> ILC1-like cells, (either CD5<sup>+</sup>CD161<sup>-</sup> or  
230 CD5<sup>+</sup>CD161<sup>+</sup>), whereas the small CD5<sup>-</sup>CD161<sup>+</sup> subset did not express any of the three  
231 chemokine receptors (Fig. 2c-d). The data thus demonstrate that the majority of ILC1-like cells  
232 (CD5<sup>+</sup>CD161<sup>+/-</sup>) express chemokine receptors enabling migration into various tissues, whereas  
233 a small subset (CD5<sup>-</sup>CD161<sup>+</sup>), similar to NK cells, lack this property.

234

### 235 **IFN $\gamma$ production is restricted to CD161<sup>+</sup> ILC1-like cells**

236 A key effector function of ILC1 cells is the rapid production of IFN $\gamma$  in response to  
237 inflammatory cytokines. Unexpectedly, only very few ILC1-like cells exhibited intracellular  
238 IFN $\gamma$  production (mean: 1,25%), whereas the large majority of CD56<sup>bright</sup> NK cells readily  
239 produced IFN $\gamma$  as expected (mean: 80,3%), (Fig. 2e). Similarly, upon polyclonal stimulation  
240 with PMA/Ionomycin, ILC1-like cells were again largely unable to produce IFN $\gamma$  (Fig. 2f).  
241 Even over an extended period of five days, ILC1-like cells produced very low amounts of IFN $\gamma$ ,  
242 again in contrast to NK cells (Fig. 2g). Importantly, differential effector functions were noted  
243 when comparing the major CD5<sup>+</sup>CD161<sup>-</sup> and the minor CD5<sup>-</sup>CD161<sup>+</sup> subsets. The CD161<sup>+</sup>  
244 subset contained a small fraction of cells able to produce IFN $\gamma$  after short-term cytokine  
245 stimulation, whereas IFN $\gamma$ -producing cells were almost undetectable in the major CD161<sup>-</sup>  
246 subset (mean: 8.2% vs. 0.9%), (Fig. 2h). Together, the data suggest that the majority of ILC1-  
247 like cells (CD5<sup>+</sup>CD161<sup>-</sup>) are functionally immature but that a minor subset of CD5<sup>-</sup>CD161<sup>+</sup>  
248 cells exerts IFN $\gamma$ -mediated effector functions.

249

### 250 **Decline of circulating ILC1-like cells with gestational age**

251 The pattern of chemokine and S1P receptor expression suggested fundamentally different  
252 migratory properties of neonatal ILC1-like cells compared to circulating NK cells under steady-  
253 state conditions. In particular, CCR7 expression was most prominent in ILC1-like cells  
254 suggesting their efficient migration to secondary lymph nodes. In order to better understand  
255 the dynamics of ILC subsets in the circulation around birth, ILC frequencies were analyzed in  
256 CB according to gestational age. As shown in Fig. 3, CD56<sup>bright</sup> and CD56<sup>dim</sup> NK cell frequency  
257 as well as total cell count seemed largely unaffected by changes in gestational age. In contrast,  
258 a significant decrease of ILC1-like cells in terms of frequency (r=0.9286, p-value= \*\* 0.0067)



259 and total cell number ( $r=0.8929$ ,  $p$ -value=  $*0.0123$ ) was found with increasing gestational age  
 260 of the CB. The decline was specific for ILC1-like cells and not observed for ILC2 and ILC3  
 261 subsets, which showed no significant changes in either direction by gestational age. Analysis  
 262 of ILC frequencies in adults revealed no further decline of ILC1-like cells in young and middle-  
 263 aged (18-55 years) or elderly (63-86 years) adults. In contrast, a strong decline was observed  
 264 for ILC2 and ILC3 subsets from neonatal to adults with an additional significant decrease from  
 265 middle-aged to elderly adults (Fig. 3). Thus, transcriptomic, phenotypic, and age-related  
 266 analysis suggest a unique as well as highly dynamic role of ILC1-like cells in the circulation  
 267 before and around the time of birth.  
 268

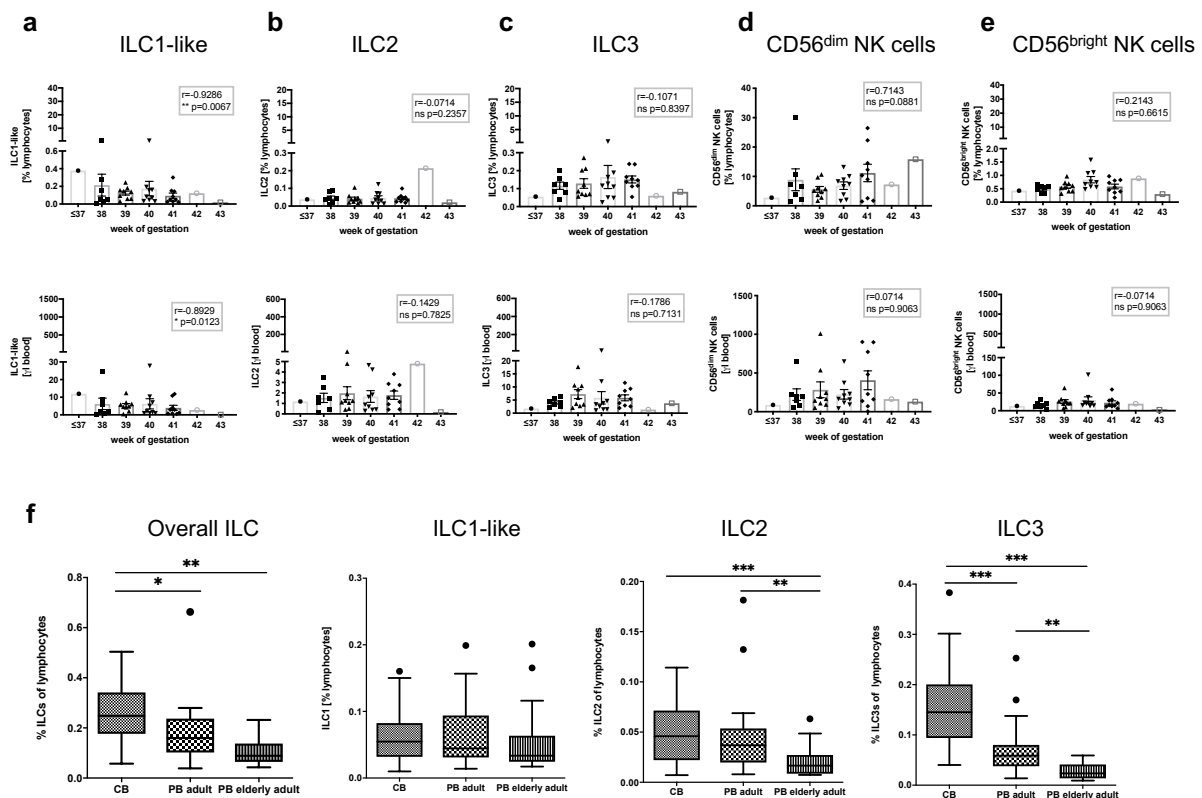

269  
 270 **Figure 3 | Frequency and cell count of ILC1-like cells from CB inversely correlates with**  
 271 **gestational age. (a-e)** Frequency (top panel) and cell count per  $\mu$ l blood (lower panel) of CB samples  
 272 ( $n=37$ ) according to gestational age are shown from left to right for ILC1-like cells, ILC2, ILC3,  
 273 CD56<sup>dim</sup> NK cells, and CD56<sup>bright</sup> NK cells. **(f)** Frequency of ILCs within lymphocytes from CB ( $n=32$ ),  
 274 adult PB ( $n=22$ , age 18-55 years), and elderly PB ( $n=20$ , age 63-86) as Tukey box plots from left to  
 275 right for total ILC (Lin<sup>-</sup>CD94<sup>+</sup>CD45<sup>+</sup>CD127<sup>+</sup>), ILC1-like cells (CD117<sup>-</sup>CRTH2<sup>+</sup>), ILC2 (CD117<sup>-</sup>  
 276 <sup>+</sup>CRTH2<sup>+</sup>), and ILC3 (CD117<sup>+</sup>CRTH2<sup>-</sup>). The heights of the bars represent the mean  $\pm$  SEM. Levels of  
 277 significance were calculated using a Spearman correlation (a-e) and a Kruskal-Wallis test with a Mann-  
 278 Whitney U post-test and Bonferroni corrected  $p$ -values for multiple testing (f), \*  $p$ -value  $< 0.05$ , \*\*  $p$ -  
 279 value  $< 0.01$ , \*\*\*  $p$ -value  $< 0.001$ . Data represents at least three different donors and experiments.  
 280  
 281

### 282 Neonatal ILC1-like cells contain a novel NK cell progenitor

283 Based on the observation that the large majority of neonatal ILC1-like cells are functionally  
 284 immature, we next explored the possibility that they constitute a novel type of lymphoid  
 285 progenitor. To this end, the two main ILC1-like subsets expressing CD5<sup>+</sup> (CD161<sup>-/+</sup>) or lacking

286 CD5<sup>-</sup> (CD161<sup>+</sup>) were seeded onto the stromal feeder cell line OP9-DL1 that is well described  
287 to support differentiation into the NK cell as well as the T cell lineage depending on the  
288 respective cytokine conditions (Freud et al., 2006; Schmitt and Zúñiga-Pflücker, 2002) (Fig.  
289 4a). The ILC1-like subsets were compared to CD56<sup>bright</sup> NK cells constituting a well-described  
290 immediate progenitor of mature NK cells and to ILC2 cells (lin<sup>-</sup>CD94<sup>-</sup>CD127<sup>+</sup>CRTH2<sup>+</sup>),  
291 representing an innate lymphocyte subset supposedly lacking NK cell differentiation potential.  
292 When ILC1-like cells were subjected to T cell differentiation conditions (Wang et al., 2006),  
293 very few cells survived the first 8 days of differentiation (Fig. S4) and no CD3<sup>+</sup> T cells could  
294 be detected suggesting that under these conditions ILC1-like cells do not efficiently  
295 differentiate into the T cell direction. In contrast, when subjected to NK cell differentiation  
296 conditions, CD5<sup>+</sup> as well as CD5<sup>-</sup> ILC1-like cells up-regulated CD94 and NKG2A expression  
297 *de novo*. Remarkably, ILC1-like cells more efficiently differentiated into mature KIR<sup>+</sup> NK cells  
298 than CD56<sup>bright</sup> NK cells, which largely maintained their initial NKG2A expression (Fig. 4b).  
299 ILC2 remained negative for CD94 and NKG2A receptors.  
300

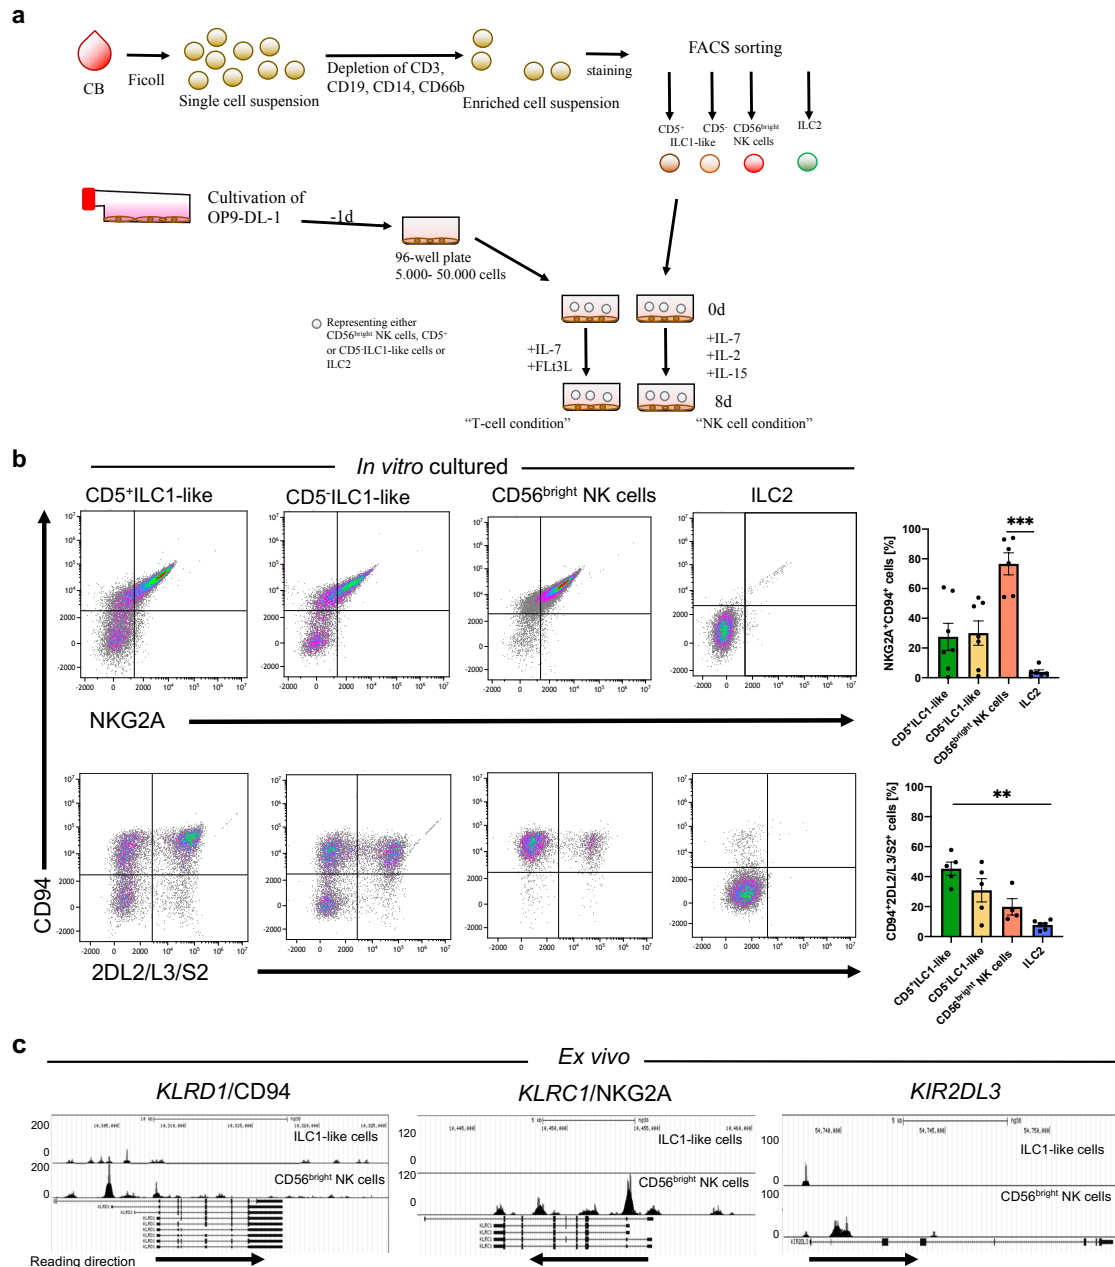

301

302 **Figure 4 | ILC1-like cells possess high NKP potential without previous epigenetic priming for NK**  
 303 **cell receptor expression. (a)** Scheme of the experimental set-up. CB MNCS were freshly isolated,  
 304 enriched using biotinylated antibodies (anti-CD3, CD14, CD19, CD66b), and sorted for CD5<sup>+</sup>ILC1-like  
 305 cells, CD5<sup>-</sup>ILC1-like cells, CD56<sup>bright</sup> NK cells, and ILC2. One day prior to sorting, OP9-DL1 cells were  
 306 plated in 96-well flat-bottom plates. Cells were either supplemented with IL-7 and FLt3L for the T cell  
 307 condition or IL-2, IL-7, and IL-15 for the NK cell condition and cultured for 8 days with medium change  
 308 at day 5. **(b)** Representative dot plots and quantification of CD94 expression together with either  
 309 NKG2A or KIR2DL2/L3/S2 expression after 8 days of co-culture on OP9-DL1 from left to right for  
 310 CD5<sup>+</sup>ILC1-like cells (n=7), CD5<sup>-</sup>ILC1-like cells (n=7), CD56<sup>bright</sup> NK cells (n=5), and ILC2 (n=6). **(c)**  
 311 Comparative analysis of regions with open chromatin by ATAC sequencing for *KLRD1* (CD94), *KLRC1*  
 312 (NKG2A), and *KIR2DL3*. For ATAC sequencing, 5000 CB-derived ILC1-like (top row) and CD56<sup>bright</sup>  
 313 NK cells (bottom row) were flow cytometrically sorted to >99% purity (n=1). Arrows underneath the  
 314 ATAC data indicate orientation and start of gene transcription. Heights of the bars represent mean ±  
 315 SEM. Levels of significance were calculated with a One-Way ANOVA with a multiple comparison  
 316 post-test (Kruskal-Wallis test), \* p-value < 0.05, \*\* p-value < 0.01, \*\*\* p-value < 0.001. Data represents

317 at least three different donors and experiments (a-b). Data represents one experiment with one donor  
318 (c).

319 Based on the rapid upregulation of NK cell receptors on ILC1-like cells in culture we were  
320 wondering if the respective genes were already epigenetically poised for transcription. To this  
321 end, we analyzed sorted neonatal ILC1-like cells as well as NK cells by ATACseq, constituting  
322 a sensitive global method to assess chromatin accessibility, which serves as correlate for  
323 epigenetic remodeling of the locus. Whereas in CD56<sup>bright</sup> NK cells, the CD94, NKG2A, and  
324 KIR2DL3 genes exhibited highly accessible chromatin regions around the transcriptional start  
325 points as expected, in ILC1-like cells only moderate (CD94) or no signs of chromatin  
326 remodeling (NKG2A, KIR2DL3) were found (Fig. 4c), excluding epigenetic conditioning  
327 towards expression of these NK cell receptors. In contrast, T cell specific markers such as CD5  
328 and CD161 exhibited open chromatin structures in the 5'-regulatory regions in ILC1-like cells  
329 whereas they were inaccessible in NK cells (Fig. S2c).

330

### 331 **NK cells derived from neonatal ILC1-like cells are functionally mature**

332 We next assessed the functional properties of the putative NK cell population generated from  
333 neonatal ILC1-like cells *in vitro*. Analysis of CD107a mobilization, representing a correlate for  
334 the degranulation of cytotoxic granules, revealed a high frequency (mean: 61,1%) of CD107a<sup>+</sup>  
335 ILC1-like-derived NK cells upon incubation with the HLA class I-deficient target cell line  
336 K562, comparable to the results with CD56<sup>bright</sup> NK cells (Fig. 5a). Assessment of direct  
337 cytotoxicity similarly revealed comparable effector functions of NK cells derived from ILC1-  
338 like cells or CD56<sup>bright</sup> NK cells (Fig. 5b). Furthermore, NK cells derived from ILC1-like cells  
339 showed upregulation of CD16, constituting an important Fc receptor type for mediating  
340 antibody-dependent cellular cytotoxicity (ADCC) (Fig. 5c). When incubating the *in vitro*  
341 generated NK cells with the CD20-specific antibody Rituximab and the CD20<sup>+</sup> B cell line Raji,  
342 specific ADCC function was observed (mean: 37,4%) without spontaneous CD107a release in  
343 the control condition (Fig. 5d). Together, NK cells from ILC1-like cells exhibit key NK cell  
344 effector functions including mobilization of cytotoxic granules, killing of HLA-deficient target  
345 cells, and CD16-mediated ADCC.

346

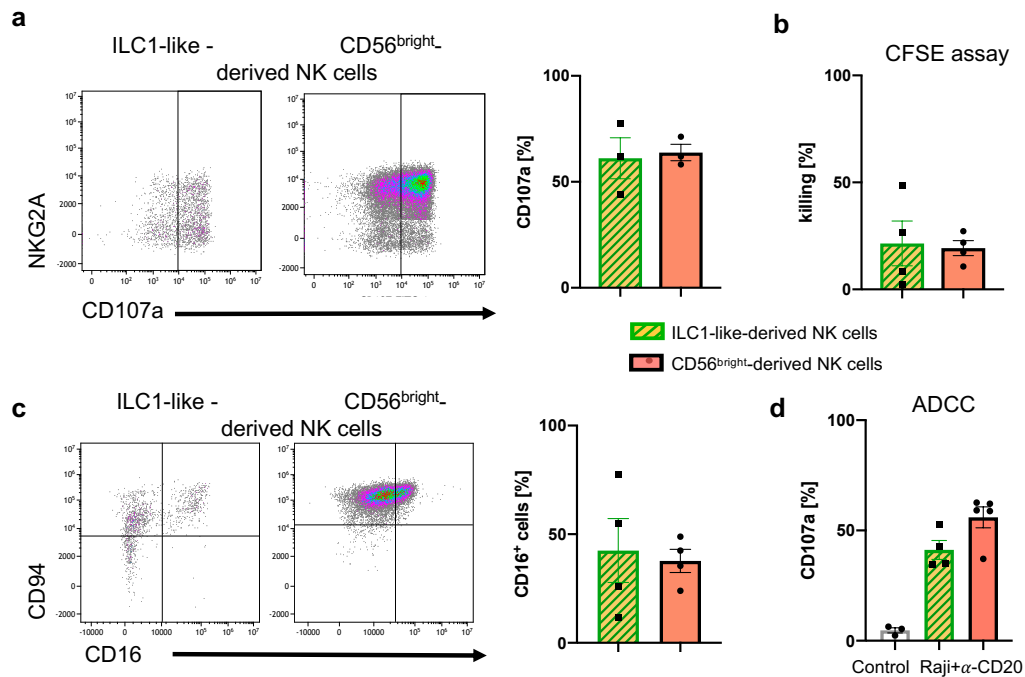

347

348 **Figure 5 | ILC1-like NKPs develop into effector NK cells.** After 15 days of co-cultivation on OP9-  
 349 DL1 stromal cells, NK cells derived from ILC1-like cells or CD56<sup>bright</sup> NK cells from CB were used in  
 350 (a) granule mobilization (n=3) and (b) cytotoxicity assays (n=4) against the HLA-deficient cell line  
 351 K562 at an effector/target ratio of 1:1. For CD107 quantification (A), analysis gates were set on cells  
 352 expressing NKG2A and/or KIR. Representative dot plots are shown for CD107a vs. NKG2A expression  
 353 of NK cells derived from ILC1-like (left) or CD56<sup>bright</sup> NK cells (right). Corresponding CD107a  
 354 frequencies are shown as bar graphs. (c) Representative dot plots for CD94 and CD16 expression are  
 355 shown for NK cells derived from ILC1-like cells (left) or CD56<sup>bright</sup> NK cells (right). Corresponding  
 356 CD16 frequencies are shown as bar graphs (n=4). (d) An ADCC assay was performed with CD20<sup>+</sup> Raji  
 357 cells and Rituximab (anti-CD20) in an effector target ratio of 1:1. Quantification of CD107a expression  
 358 is shown for ILC1-like-derived NK cells and CD56<sup>bright</sup>-derived NK cells (n=4). Height of the bars  
 359 represent mean ± SEM. Levels of significance were calculated with a non-parametric two-tailed t test  
 360 (Mann Whitney) and a One-Way ANOVA. Data points represent at least three different donors from at  
 361 least two independent experiments.

### 362 ILC1-like cells acquire KIR receptors in a NOTCH-dependent manner

363 Others and we had previously shown that the presence of Notch ligands such as delta ligand 1  
 364 (DLL1) in the hematopoietic niche plays a key role in instructing NK cell progenitors for later  
 365 KIR expression (Miller et al., 1999; Zhao et al., 2018). In order to evaluate a possible role for  
 366 NOTCH ligands in our system, experiments were repeated in a purely cytokine-based  
 367 environment as well as on OP9 stromal cells lacking DLL1 expression and then compared to  
 368 the original conditions using the DLL1-transfected OP9-DL1. The experiments using sorted  
 369 CB-derived ILC1-like cells and CD56<sup>bright</sup> NK cells revealed that stroma cells are generally  
 370 promoting NK cell differentiation of ILC1-like cells (Fig. 6), as previously seen for established  
 371 stage 2 (CD34<sup>+</sup>CD117<sup>+</sup>) NK cell progenitors. CD94<sup>+</sup>NKG2A<sup>+</sup> NK cells were generated with  
 372 highest frequency on OP9, followed by OP9-DL1 cultures and with only low frequency in  
 373 stroma free conditions (Fig. 6a-b). Thus, NOTCH signaling seemed to have no promoting  
 374 influence on the generation of CD94<sup>+</sup>NKG2A<sup>+</sup> NK cells. Furthermore, CD56<sup>bright</sup> NK cells  
 375 largely maintained CD94<sup>+</sup>NKG2A<sup>+</sup> expression in all three conditions, as expected. In contrast,

376 the presence of DLL1-transfected stroma cells had a significant influence on KIR expression:  
 377 OP9-DL1 cells efficiently supported the generation of KIR2DL2/3<sup>+</sup> NK cells whereas on OP9  
 378 stroma cells lacking DLL1 only few KIR2DL2/3<sup>+</sup> NK cells were generated. This effect was  
 379 similarly seen for CD56<sup>bright</sup> NK cells, albeit on a lower quantitative level (Fig. 6a-b). Of note,  
 380 despite functional heterogeneity within the ILC1-like subsets, CD5<sup>+</sup>(CD161<sup>-</sup>) and CD5<sup>-</sup>  
 381 (CD161<sup>+</sup>) subsets were similarly capable of differentiating into mature NK cells.  
 382

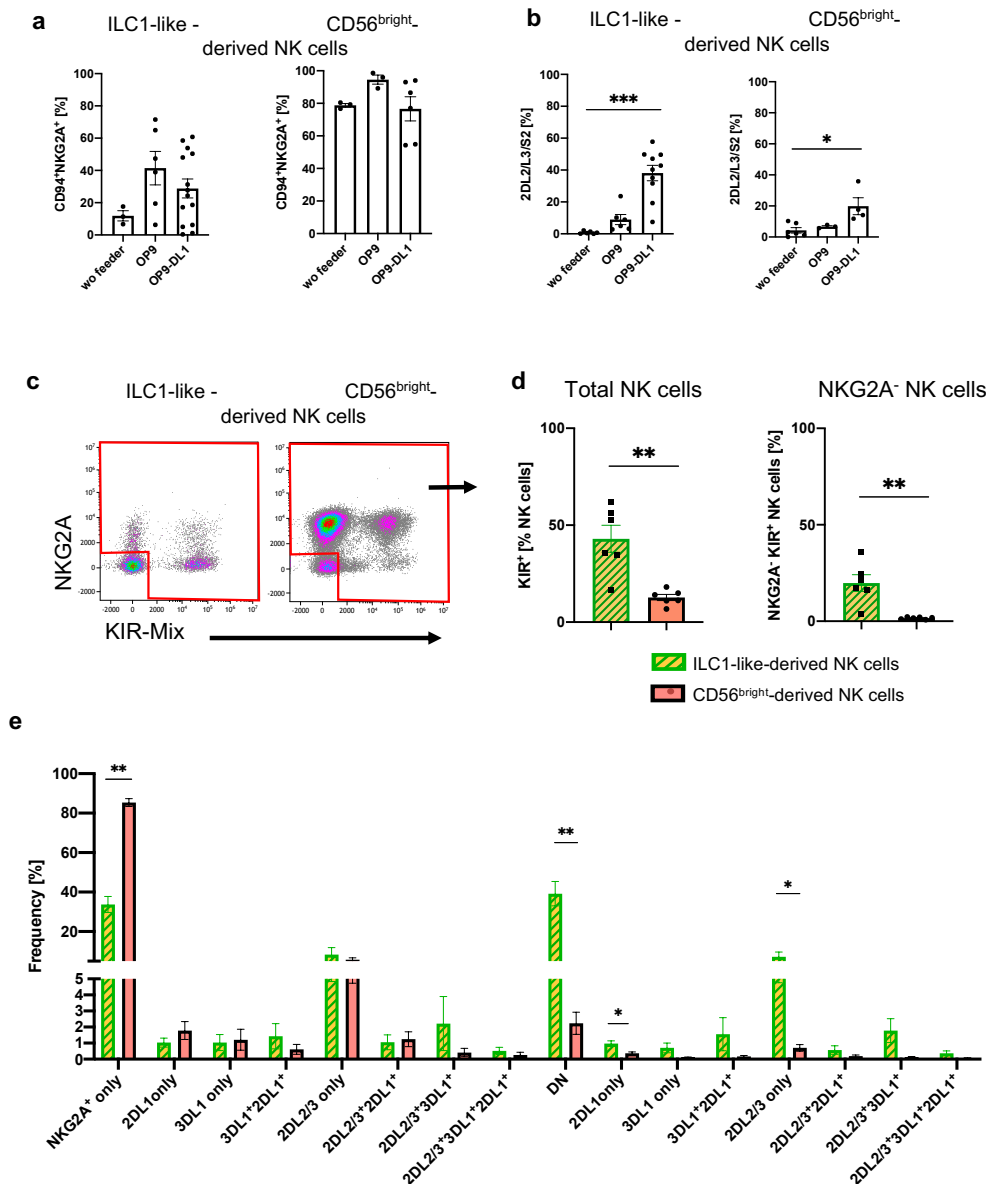

383  
 384 **Figure 6 | Differentiation of ILC1-like NKP lead to formation of complex NK cell repertoires via**  
 385 **NOTCH signaling.** CB-derived ILC1-like cells and CD56<sup>bright</sup> NK cells were flow cytometrically sorted  
 386 and subsequently cultured for 8 days on OP9, OP9-DL1, or without feeder cells (**a**, **b**) or cultured on  
 387 OP9-DL1 for 14 days (**c-e**). (**a**) Frequency of CD94<sup>+</sup>NKG2A<sup>+</sup> (n= 3-13) and (**b**) KIR2DL2/L3/S2<sup>+</sup> NK  
 388 cells (n=3-9). (**c**) Representative dot plots for NKG2A and KIR (comprising antibodies against  
 389 KIR2DL2/L3/S2, KIR2DL1/S1/S3/S5, and KIR3DL1) of ILC1-like-derived NK cells (left hand side)  
 390 and CD56<sup>bright</sup>-derived NK cells (right hand side). (**d**) Frequency of total KIR<sup>+</sup> (left hand side) and  
 391 KIR<sup>+</sup>NKG2A<sup>-</sup> (right hand side) NK cells derived from ILC1-like cells and CD56<sup>bright</sup> NK cells,  
 392 respectively (n=6). (**e**) Dissection of NK cell repertoire diversity of NK cells derived from ILC1-like  
 393 cells and CD56<sup>bright</sup> NK cells, respectively by combinatorial analysis of the major inhibitory receptors

394 KIR2DL1, KIR2DL2, KIR2DL3, KIR3DL1, and NKG2A at day 14 (n=5-6, one donor missing  
395 KIR3DL1). DN refers to NKG2A<sup>-</sup>KIR<sup>-</sup> NK cells. Height of the bars represent mean ± SEM. Levels of  
396 significance were calculated with a One-Way ANOVA with a multiple comparison post-test (Kruskal-  
397 Wallis test) (**a**, **b**) and an unpaired t test (Mann Whitney U). \* p-value < 0.05, \*\* p-value < 0.01. Data  
398 represents at least three independent experiments (see Fig. S5 for individual KIR/NKG2A expression),  
399 \* p-value < 0.05, \*\* p-value < 0.01, \*\*\* p-value < 0.001. Data represent at least three independent  
400 experiments with each dot representing an individual donor.

## 401 402 **ILC1-like progenitors from CB and PB support the generation of highly diversified NK** 403 **cell repertoires**

404 In order to more thoroughly assess the NK cell differentiation potential of ILC1-like cells we  
405 surveyed the complexity of the *in vitro* generated NK cell repertoires by analyzing expression  
406 of NKG2A together with KIR2DL1, KIR2DL2/2DL3, and KIR3DL1, representing the major  
407 inhibitory receptors for the four HLA class I-encoded epitopes E, C2, C1, and Bw4,  
408 respectively. Furthermore, KIR genotypes were determined to evaluate the presence/absence  
409 polymorphism of KIR genes in each individual (Fig. S5). A prominent population of NKG2A<sup>-</sup>  
410 KIR<sup>+</sup> cells, representing a particularly late stage of NK cell development, was detected in  
411 cultures from ILC1-like cells but were almost absent in CD56<sup>bright</sup>-derived NK cells (mean:  
412 19.8% vs. 1.6%, p-value: 0.002) (Fig. 6c-d). Moreover, a higher frequency of NK cells  
413 expressing any of the four inhibitory KIR was observed from ILC1-like cells compared to  
414 CD56<sup>bright</sup>-derived NK cells (mean: 42.9% vs. 12.7%, p-value: 0.004) (Fig. 6d). A similar  
415 picture emerged already after 8 days of co-cultivation (see Fig. S6), suggesting a rapid  
416 differentiation process. ILC1-like cells created a much more diversified NK cell repertoire  
417 compared to CD56<sup>bright</sup> NK cells. All possible clonal receptor combinations were generated and  
418 all KIR<sup>+</sup> clonotypes lacking NKG2A and thus representing advanced steps of NK cell  
419 differentiation were more frequently found in cultures from ILC1-like cells than from CD56<sup>bright</sup>  
420 NK cells (Fig. 6e).

421  
422 Next, we were wondering, if the observed developmental potential towards the NK cell lineage  
423 is similarly present in adult ILC1-like cells from peripheral blood. When cultivating flow  
424 cytometrically sorted PB ILC1-like cells on OP9-DL1 stroma cells, either no or only moderate  
425 NK cell expansion was detected (Fig. S7a-b). Nonetheless, ILC1-like cells from PB, like their  
426 counterparts from CB, supported the development of mature NK cells, expressing significantly  
427 more KIR2DL2/2DL3 (mean: 49.9%) compared to PB CD56<sup>bright</sup>-derived-NK cells (mean:  
428 13.5%) (Fig. S7c). Furthermore, as already observed with CB, ILC1-like cells from PB were  
429 able to mature into NKG2A<sup>-</sup>KIR<sup>+</sup> NK cells with higher frequency (mean: 14.7%) than  
430 CD56<sup>bright</sup>-derived NK cells (mean: 3.6%) (Fig. S7d).

## 431 432 **High clonogenic potential of ILC1-like cells towards generation of mature effector NK** 433 **cells**

434 We next analyzed the differentiation potential of neonatal ILC1-like cells on the clonal level.  
435 To this end, single cells from the three major ILC1-like populations defined above  
436 (CD161<sup>+</sup>CD5<sup>-</sup>, CD161<sup>-</sup>CD5<sup>+</sup>, CD161<sup>+</sup>CD5<sup>+</sup>) as well as from CD56<sup>bright</sup> NK cells were flow  
437 cytometrically deposited and cloned on OP9-DL1 cells. The cloning efficiency at day 14 was  
438 highest for CD56<sup>bright</sup> NK cells (mean: 50%), followed by CD161<sup>+</sup>CD5<sup>+</sup> cells (mean: 35.2%),  
439 CD161<sup>+</sup>CD5<sup>-</sup> (mean: 22.6%), and CD161<sup>-</sup>CD5<sup>+</sup> (mean: 15.9%) (Fig. 7a). The NKG2A<sup>-</sup>KIR<sup>-</sup>

440 subset, lacking *bona fide* NK cell markers was infrequent in all clonal cultures, ranging from  
 441 1-8% per clone thereby excluding efficient generation of any non-NK cells. Remarkably, the  
 442 dominant population generated from CD161<sup>+</sup>CD5<sup>+</sup> (mean: 92.3%) and to a lesser extent also  
 443 from CD161<sup>+</sup>CD5<sup>-</sup> ILC1-like cells (mean: 48.2%) were NKG2A<sup>-</sup>KIR<sup>+</sup> NK cells, representing  
 444 an advanced step of NK cell differentiation as outlined above. The population was less frequent  
 445 in CD161<sup>+</sup>CD5<sup>+</sup> clonal cultures (mean: 25.8%) and rare when starting from CD56<sup>bright</sup> cells  
 446 (4.9%) (Fig. 7b) consistent with the results from bulk differentiation experiments. CD56<sup>bright</sup>  
 447 NK cells frequently lost their NKG2A and CD94 expression during clonal expansion (mean:  
 448 51.6%).  
 449

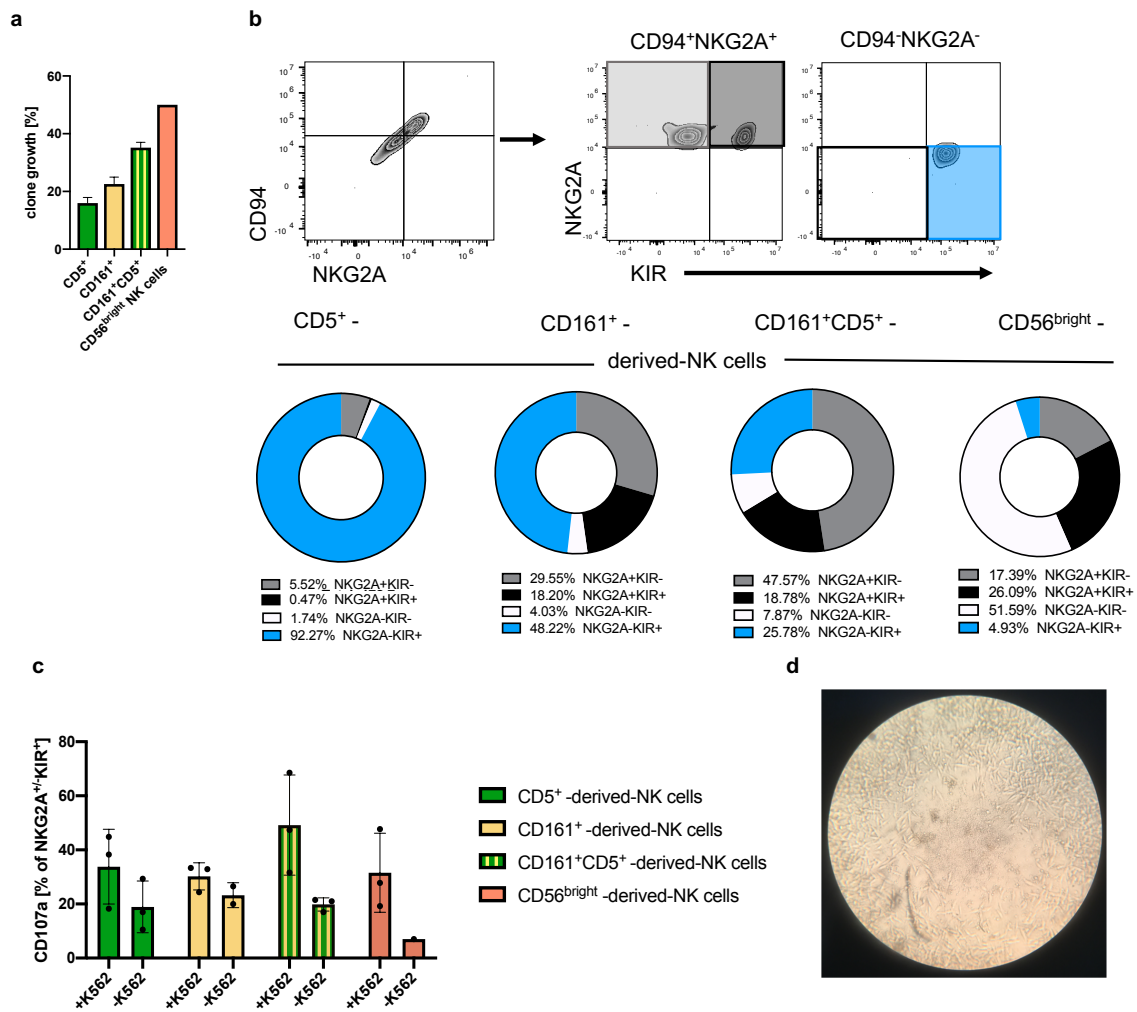

450

451 **Figure 7 | Clonal analyses of ILC1-like cells reveal high frequency of NKPs developing into**  
 452 **cytotoxic KIR<sup>+</sup>NKG2A<sup>-</sup> NK cells.** Single cells from the four ILC1-like subsets CD5<sup>+</sup>, CD161<sup>+</sup>, and  
 453 CD161<sup>+</sup>CD5<sup>+</sup> were flow cytometrically deposited in 96 well plates for clonal differentiation cultures on  
 454 OP9-DL1 stroma cells. (a) Efficiency of clone growth at day 14. (b) Exemplary gating strategy for *in vitro*  
 455 differentiated clones at day 28: CD94<sup>+</sup>NKG2A<sup>+</sup> cells as well as CD94<sup>-</sup>NKG2A<sup>-</sup> cells were further  
 456 divided on the basis of their respective NKG2A and KIR expression (upper panel). Pie charts and  
 457 corresponding frequency of clones for the four different subsets (bottom panel): NKG2A<sup>+</sup>KIR<sup>-</sup> (grey),  
 458 NKG2A<sup>+</sup>KIR<sup>+</sup> (black), NKG2A<sup>-</sup>KIR<sup>-</sup> (white), and NKG2A<sup>-</sup>KIR<sup>+</sup> (blue) (n=20 for all ILC1-like subsets,  
 459 n=4 for CD56<sup>bright</sup> NK cells). (c) Quantification of CD107a cytotoxic mobilization assay with K562 cells  
 460 in an effector/ target ratio of 1:1 from single cell cultures (n=3). (d) Representative microscopic picture  
 461 from single cell culture exhibiting erasure of feeder cells by developing NK cells in the central region



462 of the well. The heights of the bars represent the mean  $\pm$  SEM. Levels of significance were calculated  
463 with a One-Way ANOVA with a multiple correction post-test (Kruskal-Wallis test). Data were  
464 generated from 288 CD5<sup>+</sup> and CD161<sup>+</sup> cells each, 177 CD5<sup>+</sup>CD161<sup>+</sup> cells, and 12 CD56<sup>bright</sup> NK cells  
465 sorted from a single donor.

466 Stimulation of NK cell clones by K562 target cells led to increased granule mobilization as  
467 documented by the increased surface expression of CD107 (Fig. 7c). Among ILC1-like subsets,  
468 NK cells from CD161<sup>+</sup>CD5<sup>+</sup> cell showed the highest frequency of CD107 expression (mean:  
469 49.2%), whereas the CD107 levels were comparable for clones generated from CD161<sup>+</sup>CD5<sup>-</sup>,  
470 CD161<sup>-</sup>CD5<sup>+</sup>, or CD56<sup>bright</sup> NK cell. Notably, elevated levels of CD107 were already observed  
471 in the absence of K562 for clones derived from ILC1-like cells (Fig. 7c), which might be due  
472 to pre-activation by murine OP9-DL1 feeder cells constituting targets for the *de novo* generated  
473 NK cells (Fig. 7d).

474

## 475 Discussion

476 Here we present the identification of an ILC1-like NKP within human CB and PB that is able  
477 to differentiate into mature cytotoxic NK cells. ILC1-like NKPs have a lin<sup>-</sup>CD127<sup>+</sup>CD117<sup>-</sup>  
478 CRTH2<sup>-</sup> phenotype, matching innate lymphoid cells previously defined as ILC1 (Bernink et al.,  
479 2013), but lacking expression of TBET, a common signature transcription factor of ILC1 and  
480 NK cells. We demonstrate that ILC1-like cells can be broken down into two subsets, a major  
481 CD5<sup>+</sup>CD161<sup>-/+</sup> subset expressing the chemokine receptors CCR7, CCR4, and CCR9 and failing  
482 to secrete IFN $\gamma$  and a small CD5<sup>-</sup>CD161<sup>+</sup> subset not expressing any of the three chemokine  
483 receptors but showing IFN $\gamma$  secretion after specific stimulation. Despite their difference in  
484 phenotype and functionality, both ILC1-like subsets possessed NKP potential. Single-cell  
485 cloning experiments revealed a high NKP frequency within CB-derived ILC1-like cells and a  
486 high propensity to differentiate into mature NK cells. In contrast to established CD34<sup>+</sup> or CD34<sup>-</sup>  
487 CD117<sup>+</sup> NKPs that predominantly generate NKG2A<sup>+</sup>KIR<sup>-</sup> NK cells, differentiation of ILC1-  
488 like NKPs led to a high frequency of KIR<sup>+</sup> NK cells including the NKG2A<sup>-</sup>KIR<sup>+</sup> subset,  
489 constituting an advanced maturation stage. The fact that neonatal ILC1-like cells are clearly  
490 distinct from NK cells on the transcriptomic, epigenetic, and functional level in combination  
491 with the single cell cloning experiments suggest that ILC1-like NKPs have a true progenitor  
492 relationship to NK cells.

493

494 Our study provides to our knowledge the first comparison of ILC1-like and NK cells by deep  
495 transcriptomic and epigenetic analysis in human blood. In the present study, ILC1-like cells  
496 could be clearly distinguished from CD56<sup>bright</sup> NK cells and the more mature CD56<sup>dim</sup> NK cells  
497 by RNAseq. The CB-derived ILC1-like cells completely lacked NK cell-specific molecules  
498 such as CD94, NKG2A, and KIR on the transcriptional and surface expression level. Moreover,  
499 chromatin accessibility studies demonstrated that the regulatory regions of the respective NK  
500 cell receptors were open in NK cells but closed in ILC1-like cells further confirming a lack of  
501 transcriptional activity for NK cell receptors in ILC1-like cells. The clear distinction between  
502 ILC1-like cells and NK cells contrasts with previous studies showing nearly indistinguishable  
503 expression patterns of the two group 1 ILC members (Fuchs et al., 2013; Salomé et al., 2019;  
504 Yudanin et al., 2019). In the case of CD127-ILC, this is clearly a question of defining ILC1,  
505 since CD127-ILC1 cells are different from circulating NK cells due to expression of CD103 but  
506 indistinguishable from tissue-resident NK cells, including the expression of EOMES and

507 CD94/NKG2A NK cell receptors(Fuchs et al., 2013) and might thus as well be defined as NK  
508 cells. In case of CD127<sup>+</sup>ILC1, contamination with CD56<sup>bright</sup> NK cells represents the main  
509 obstacle that has to be avoided by including CD94 in the lineage depletion cocktail(Bernink et  
510 al., 2013). Since the majority of CD56<sup>bright</sup> NK cells are CD127<sup>+</sup> and CD16<sup>-</sup>, ILC1 subsets  
511 defined as CD56<sup>+</sup>CD127<sup>+</sup> or CD56<sup>+</sup>CD16<sup>-</sup> without exclusion of CD94<sup>+</sup> cells will be likely  
512 contaminated with CD56<sup>bright</sup> NK cells(Loyon et al., 2019; Salomé et al., 2019; Trabanelli et  
513 al., 2019; Yudanin et al., 2019). In contrast, the present data support previous work showing  
514 that NK cells can be accurately separated from other ILCs by consideration of CD94/NKG2A  
515 expression(Bernink et al., 2013; Mjösberg et al., 2011; Scoville et al., 2017).

516  
517 Almost all NK cell precursors described so far are characterized by expression of CD117  
518 (cKIT), the receptor for stem cell factor (SCF), including CD34<sup>+</sup> early progenitors (stage 2) as  
519 well as more differentiated CD34<sup>-</sup> stages(Freud et al., 2006). Moreover, it was previously  
520 shown that CD117 is gradually downregulated during NK cell differentiation in secondary  
521 lymph nodes from early to late stages of NK cell development with mature CD16<sup>+</sup>CD56<sup>dim</sup> NK  
522 cells being the only CD117<sup>-</sup> stage(Freud et al., 2016). The absence of CD117 on ILC1-like  
523 NKPs represents thus an unusual feature for NK cell progenitors and demonstrates that cKIT  
524 signaling is not required for triggering their inherent NK cell differentiation potential. The lack  
525 of CD117 sets ILC1-like NKPs also apart from the recently described circulating Lin<sup>-</sup>  
526 CD7<sup>+</sup>CD127<sup>+</sup>CD117<sup>+</sup> multipotent ILC progenitors (ILCp) that gave rise to all ILC subsets  
527 including NK cells(Lim et al., 2017). We thus hypothesize that circulating ILC1-like NKPs are  
528 at a more advanced developmental stage than CD34<sup>+</sup>CD117<sup>+</sup> or CD34<sup>-</sup>CD117<sup>+</sup> NK cell  
529 progenitors and also compared to ILCp. However, the upstream progenitor of ILC1-like NK  
530 cells is currently elusive. Although it is possible that ILC1-like NK cells are developing from  
531 previously described CD117<sup>+</sup> NKPs, a linear developmental relationship between them appears  
532 to be unlikely since the specific potential to generate NKG2A-KIR<sup>+</sup> NK cells could so far not  
533 be detected when starting from the more immature CD117<sup>+</sup> NKPs.

534  
535 Notably, some of the most significant transcriptomic differences between ILC1-like cells and  
536 NK cells pertained to the ILC1-specific expression of genes classically attributed to the T cell  
537 lineage such as *CD5*, *CD6*, *CD28*, and also components of the CD3/TCR complex, but without  
538 detectable expression of CD3 or TCR on the cell surface. The expression of T cell lineage-  
539 related molecules is in line with previous reports of ILC1 in peripheral blood (Roan et al., 2016)  
540 and tonsils by single cell RNAseq analysis(Bjorklund et al., 2016). Of note, in the course of  
541 our experiments we did not observe any potential for T cell development neither with OP9 nor  
542 OP9-DL1 and this was true in the presence of NK cell (IL-2, IL-7, and IL-15) as well as T cell  
543 (IL-7 and FLT3L) conditions. This contrasts to the properties of CD34<sup>+</sup> early hematopoietic  
544 progenitors as reported previously(Zúñiga-Pflücker, 2004). Nonetheless, the T cell signature  
545 could be an indication of a thymic origin of the circulating ILC1-like NKPs. Of note, it has  
546 been proposed that NKPs develop in the thymus from progenitors with failed T-cell  
547 program(Klein Wolterink et al., 2010). Unlike the original model where NK/T bi-potent  
548 precursors directly convert to NK cells in the thymus after an unsuccessful attempt to become  
549 T-cells(Klein Wolterink et al., 2010), it could be speculated that 'T-cell failure' might lead to  
550 the release of CD5<sup>+</sup> ILC1-like NKP from thymus into the periphery. Of note, CD5<sup>+</sup> ILC-like  
551 cells expressing intracellular CD3 components were previously isolated from the

552 thymus(Nagasawa et al., 2017) and intracellular CD3 $\delta$  expression was reported previously  
553 within human fetal NK cells(Phillips et al., 1992). Further studies of thymic ILC/NK  
554 progenitors will be necessary to better understand the origin of ILC1-like NKPs.

555

556 The prevailing view of NK cell development sees a linear consecutive relationship between  
557 CD117<sup>+</sup> NKPs, CD56<sup>bright</sup>, and finally CD56<sup>dim</sup> NK cells(Freud et al., 2006). This model was  
558 majorly defined by analysis of progenitors in SLNs(Freud et al., 2006). The present data suggest  
559 that in the circulation, CD56<sup>bright</sup> and CD56<sup>dim</sup> NK cells might not be necessarily connected in  
560 a similar linear developmental relationship. Generally, CD56<sup>bright</sup> NK cells mostly rely on  
561 NKG2A as their only and rather broad HLA class I-specific inhibitory receptor, whereas the  
562 more mature CD56<sup>dim</sup> NK cells are characterized by complex HLA class I-educated KIR  
563 repertoires. The latter is necessary for sensitive detection of pathogen- or tumor-mediated  
564 downregulation of selected HLA class I genes. So far, a progenitor/product relationship has  
565 been widely assumed for CD56<sup>bright</sup> and CD56<sup>dim</sup> NK cells respectively, although other  
566 possibilities such as a branched model for NK cell development were suggested(Cichocki et  
567 al., 2019; Michel et al., 2016). Here, employing identical differentiation conditions, ILC1-like  
568 NKPs rather than CD56<sup>bright</sup> NK cells were able to reconstitute complex NK cell receptor  
569 repertoires including NKG2A<sup>-</sup>KIR<sup>+</sup> NK cells. On the other hand, CD56<sup>bright</sup> NK cells showed a  
570 high proliferative capacity and mainly remained NKG2A<sup>+</sup>KIR<sup>-</sup>. The data are thus compatible  
571 with a branched model in which circulating CD56<sup>bright</sup> NK cells constitute a rather stable, non-  
572 cytotoxic NK cell subset with cytokine-based regulatory functions that is however not majorly  
573 involved in the generation of KIR repertoires. In parallel, ILC1-like cells could directly  
574 differentiate into CD56<sup>dim</sup> NK cells leading to the diversification of KIR repertoires observed  
575 *in vivo*. In favor of this model, many of the T cell-specific markers that are in ILC1-like NKPs  
576 are also found in CD56<sup>dim</sup> NK cells, whereas they are low or absent in CD56<sup>bright</sup> NK cells.  
577 Examples of this are *TRBC1*, encoding the T cell receptor  $\beta$  constant region, *BCL11B* encoding  
578 a TF important for T cell function(Hosokawa et al., 2019), and *CD3D*.

579

580 The frequency of ILC1-like cells was particularly high in CBs of early gestational age and  
581 decreased until term. Similar changes were not observed for other ILC groups that exhibited no  
582 changes in relation to gestational age but significantly decreased after birth in an ageing-like  
583 process. We hypothesize that the loss of ILC1-like cells is due to preferential migration into  
584 tissues during the perinatal phase of development. The large majority of ILC1-like cells  
585 expressed the chemokine receptor CCR7, which supports migration to SLN, an established site  
586 of NK cell maturation. Further subsets co-expressed CCR4 or CCR9, supporting migration to  
587 skin and the gastrointestinal tract. We thus suggest that the majority of ILC1-like NKPs travel  
588 to the SLNs before and around birth to differentiate into NK cells and eventually reenter  
589 circulation. The migration of ILC1-like NKPs to SLN would provide them with the necessary  
590 niche signals required for further maturation. A key signal required for NK cell maturation  
591 including expression of KIR is provided by NOTCH and the necessary NOTCH ligands are  
592 highly expressed in SLN(Radtke et al., 2013). Thus, the dependence of ILC1-like NKPs on  
593 NOTCH signaling as observed here in OP-9 differentiation assays would support the idea of  
594 migration to lymphatic tissue for successful final maturation.

595

596 In summary, the present work constitutes a thorough dissection of group 1 ILCs in neonatal  
597 blood on the molecular and functional level. We demonstrate that ILC1-like cells are very  
598 different from NK cells on the transcriptional, epigenetic, and functional level but instead  
599 constitute a potent NKP. The  $\text{lin}^- \text{CD127}^+ \text{CD117}^-$  ILC1-like NKP is distinguished from  
600 previously defined NKPs and ILCPs by the absence of CD117 and the presence of T cell-  
601 specific molecules and also by the property of generating diversified NK cell repertoires  
602 characterized by KIR expression as well as the downregulation of NKG2A. ILC1-like NKPs  
603 were found in CB and PB, but the latter were less potent in generating mature NK cells. The  
604 study suggests high spatial and temporal dynamics within group I ILC during perinatal  
605 development that is driven by the migratory properties of ILC1-like NKP. For realization of the  
606 NKP potential, ILC1-like NKPs would travel to SLN, where they are exposed to signals such  
607 as NOTCH ligands and IL-15 that induce NK cell maturation. Although the fate of ILC1 NKPs  
608 in SLN is unknown, we suggest that they are released back to the circulation for building up  
609 diversified NK cell repertoires after birth.

610

## 611 **Methods:**

### 612 **Human samples and ethics statement**

613 Buffy coats of anonymous, healthy blood donations were kindly provided by the  
614 Blutspendezentrale at the University Hospital Düsseldorf. Umbilical cord bloods used within  
615 this study were collected from the José Carreras Stem Cell Bank at the ITZ. The protocol used  
616 was accepted by the institutional review board at the University of Düsseldorf (study number  
617 2019-383) and is in accordance to the Declaration of Helsinki. Blood samples were either  
618 processed directly or left at room temperature (RT) overnight and were processed the following  
619 day. Information about the week of gestation was provided by the mothers.

620

### 621 **Isolation of MNCs from cord blood and buffy coats**

622 From each blood sample, aliquots were taken for KIR genotyping and assessment of whole  
623 blood cell count (Cell Dyn 3500R, Abbot Laboratories, Illinois, USA). CB (1:1) and buffy coats  
624 (1:2) were diluted with sterile 1xPBS (Gibco by Life Technologies, California, USA) and  
625 MNCs were isolated by density gradient centrifugation (Biocoll, 1.077g/cm<sup>3</sup>/ Biochrom Merck  
626 Millipore). Cells were resuspended in 5ml of ice-cold ammonium chloride solution (pH=7.4,  
627 University Clinic Düsseldorf) for 5 min at RT to lyse residual erythrocytes and washed three  
628 times afterwards. MNCs were counted and cryopreserved or directly used for further analyses.

629

### 630 **Flow cytometry analyses**

631 Cells were extracellularly stained with the following FITC conjugated antibodies for the lineage  
632 panel, as previously described (Bennstein et al., 2019): anti-CD3 (UCHT1), anti-CD1a (HI149),  
633 anti-CD14 (HCD14), anti-CD19 (HIB19) anti-TCR $\alpha\beta$  (IP26), anti-TCR $\gamma\delta$  (B1), anti-CD123  
634 (6H6), anti-CD303/BDCA-2 (201A), anti-Fc $\epsilon$ R1a (AER-37(CRA-1)), anti-CD235 $\alpha$  (HI264),  
635 anti-CD66b (G10F5), anti-CD34 (581) all from BioLegend. Of note, anti-TCR $\alpha\beta$  (clone: IP26),  
636 anti-TCR $\gamma\delta$  (clone: B1) were not included when analyzing the age-related decline in CB, adult  
637 PB, and elderly adult PB. The following antibodies were further used within this study: anti-  
638 CD94-PE/Cy7 or -APC (DX22); anti- CD3 Brilliant violet (BV)<sup>TM</sup>510 (UCHT1); anti-CD56-  
639 APC/Cy7, BV650<sup>TM</sup> or PE/Dazzle<sup>TM</sup> 594 (HCD56); anti-CD117-PE or BV421<sup>TM</sup> (104D2);  
640 anti-CRTH2-PE/Dazzle<sup>TM</sup> 594 (BM16); anti-CD161-Alexa Flour<sup>®</sup> 700 (HP-3G10); anti-CD5-

641 APC/Cy7 (L17F12); anti-CD6-PE (BL-CD6); anti-CD158b1,b2,j (2DL2/L3/S2)-FITC or -PE  
642 (DX27); CD158e1 (KIR3DL1) –Alexa Fluor® 700 or –PE (DX9); CD158a,h,g  
643 (KIR2DL1/S1/S3/S5) –FITC or –PE (HP-MA4); anti-IFN $\gamma$ -PE/Cy7 (B27); anti-CCR4-APC  
644 (L291H4), anti-CD107a-FITC (H4A3), and goat anti-mouse IgG (Poly4053), all from  
645 BioLegend (California, USA), anti-CD127-PE/Cy5 (R34.34), anti-CD28-PE (CD28.2), anti-  
646 NKG2A-APC (Z199), all from Beckman Coulter (California, USA), anti-CD158b2  
647 (KIR2DL3)-FITC (180701) and anti-CCR9 unconjugated (248621), both from R&D systems.  
648 Anti-CCR7-PE-CF<sup>594</sup> (150503) was purchased by BD Bioscience (California, USA).  
649 Intracellular staining of anti-Tbet-BV605<sup>TM</sup> (4B10, BioLegend), and anti-Eomes- PE-  
650 eFluor610<sup>TM</sup> (WD1928, Invitrogen) was performed with the FoxP3 staining kit (Thermo  
651 Fischer Scientific) and corresponding protocol. All flow cytometric analyses were performed  
652 on a Cytotflex (Beckman Coulter) with previously described settings (Bennstein et al., 2019).  
653 Analyses were performed on the Kaluza software 2.1 (Beckman Coulter). t-Distributed  
654 Stochastic Neighbor Embedding (t-SNE) analyses for chemokine receptor expression on CB  
655 ILC1-like cells was done employing a 10-color staining protocol. The cell surface receptors  
656 CD127, CCR7, CD161, CD5, with additional staining of CCR9 or CCR4 were used to apply t-  
657 SNE analyses for ILC1-like cells with 500 iterations using FlowJo software (BD).

658

### 659 **Cell sorting**

660 Monocytes, T- and B-cells were depleted in CB MNCs via MojoSort<sup>TM</sup> Streptavidin Nanobeads  
661 (BioLegend) using the supplier's negative selection protocol. In brief, ~10-20x10<sup>7</sup> cells were  
662 stained with the biotinylated antibodies anti-CD3 (OKT3, 3.2 $\mu$ l/10x10<sup>7</sup> cells), anti-CD14  
663 (63D3, 4.8 $\mu$ l/10x10<sup>7</sup>), anti-CD19 (HIB19, 4.8 $\mu$ l/10x10<sup>7</sup>), and anti-CD66b (G10F5,  
664 2.4 $\mu$ l/10x10<sup>7</sup>) from BioLegend for 15min on ice. After washing, the cells were incubated for  
665 15min on ice with MojoSort<sup>TM</sup> Streptavidin Nanobeads (50 $\mu$ l/10x10<sup>7</sup>, BioLegend). After an  
666 additional washing step, the cells were separated on a MOJO magnet for 5min, harvested, and  
667 further stained with lineage panel and ILC inclusion antibodies for sorting. CD56<sup>dim</sup> NK cells  
668 (lin<sup>-</sup>CD94<sup>+</sup>CD56<sup>dim</sup>), CD56<sup>bright</sup> NK cells (lin<sup>-</sup>CD94<sup>+</sup>CD56<sup>bright</sup>), and ILC1-like cells (lin<sup>-</sup>CD94<sup>-</sup>  
669 CD127<sup>+</sup>CD117<sup>-</sup>CRTH2<sup>-</sup>) were sorted for RNAseq analyses and the latter two for differentiation  
670 on OP9-DL1. Additionally, ILC2 (lin<sup>-</sup>CD94<sup>-</sup>CD127<sup>+</sup>CD117<sup>-/+</sup>CRTH2<sup>+</sup>) were sorted for *in vitro*  
671 differentiation on OP9-DL1. ILC1-like cells were further gated on CD5<sup>+</sup> and CD5<sup>-</sup>. Cell sorting  
672 was performed on a MoFlo XDP (Beckman Coulter).

673

### 674 **Functional analyses**

675 CB MNCs were stimulated in a 24-well plate with human (h) IL-12 (5ng/ml) and IL-18  
676 (50ng/ml) overnight or 2h with PMA/ Ionomycin at a concentration of 10ng/ml PMA and  
677 1 $\mu$ g/ml Ionomycin. Subsequently, Brefeldin A Solution (1000X, BioLegend) was added to each  
678 well (dilution 1000- 3000-fold depending on the length of the experiment) for an additional 2h  
679 (PMA/ionomycin) or 4h (cytokine stimulation). The cells were stained extracellularly to detect  
680 ILC surface markers and intracellularly for IFN $\gamma$  expression using the intracellular staining kit  
681 (BioLegend). Sorted ILC1-like and NK cells were stimulated with human (h) IL-12 (5ng/ml)  
682 and hIL-18 (50ng/ml) for 5 days, supernatant was collected at day 1 and 5 for LEGENDplex<sup>TM</sup>  
683 Human T Helper Cytokine Panel (BioLegend).

684

685

## 686 **Maintenance of cell lines**

687 Stroma cell lines OP9 and OP9-DL1 were kindly provided by Prof. Dr. Zúñiga-Pflücker,  
688 University of Toronto and were cultivated in DMEM low glucose (1g/l) + Glutamax (Gibco)  
689 with 1% Penicillin/Streptavidin (Gibco) and 10% Fetal calf serum (FCS) (Merck). Both cell  
690 lines were cultivated in T75 culture flasks, kept at 37°C with 5% CO<sub>2</sub>, trypsinized, and split  
691 twice a week 1:5. K562 cells were cultured in DMEM high glucose (4,5g/l) (Gibco) with  
692 50µg/ml Gentamycin (Gibco) and 10% FCS.

693

## 694 **Co-cultivation of OP9 and OP9-DL1 with PB or CB MNCs**

695 5.000 - 50.000 OP9/OP9-DL1 cells per well were transferred into 96-flat bottom plates one day  
696 prior to sorting. Cells were isolated from CB, stained, and sorted as illustrated in Figure S1.  
697 After sorting, 1000-2500 ILC1-like, ILC2, or NK cells were added onto the cell layer and  
698 cultivated in 'NK2' medium (2/3 parts DMEM (4,5g/ml glucose), 1/3 parts Ham's F12  
699 (Biochrom), 10% human AB serum, 20 mg/L Ascorbic acid, 50µmol/L ethanolamine, 50µg/L  
700 sodium-selenite (all from Sigma Aldrich), 24 µmol/L 2-mercaptoethanol, 1%  
701 Penicillin/Streptavidin, and 1% L-glutamine (all from Gibco) containing IL-2 (500U/ml,  
702 Novartis), IL-7 (10ng/ml), and IL-15 (5ng/ml, both from Miltenyi Biotec, Germany) (Fig. 4a).  
703 Medium was replaced every 3-5 days by removing half the volume of old medium and adding  
704 half the volume of fresh medium. The co-culture was phenotypically analyzed by flow  
705 cytometry after 8 and 14 days, functionality was assessed after 15-16 days by analyzing  
706 cytotoxic potential (CFSE killing assay) and degranulation (CD107a), respectively.

707 For single cell cloning, 3000 OP9-DL1 cells were transferred into 96-U bottom plates one day  
708 prior to sorting. Fresh medium was added twice a week by replacing half of the volume. Cloning  
709 efficiency was established at day 14 by microscopic inspection of each well individually.

710

## 711 **NK cell degranulation and killing assay**

712 *In vitro* cultivated ILCs and CD56<sup>bright</sup> NK cells were filtered through a 30µm strainer to remove  
713 OP9-DL1 cells. For the CD107a degranulation assay, cells were incubated with K562 at a 1:1  
714 E/T ratio with addition of a CD107a FITC mAb (H4A3, BioLegend) in a 96- round bottom  
715 plate with a centrifugation step of 5min at 500rpm. After 1h incubation at 37°C, 5% CO<sub>2</sub>,  
716 Brefeldin A (1000fold dilution) and Monensin (20nM, BioLegend) were added. After  
717 additional 4 hours, the cells were harvested, stained and analyzed via flow cytometry. For the  
718 CFSE assay, K562 cells were labelled with 5mM CFSE for 10 min at 37°C, after two washings  
719 steps with PBS containing 20% FCS, the cells were incubated for 5 min and added in a ratio of  
720 1:1 to *in vitro* generated ILC1-like- and CD56<sup>bright</sup>-derived NK cells in a 96-round bottom plate.  
721 Unlabeled and CFSE-labelled K562 without effector cells served as controls. The plate was  
722 centrifuged for 5min at 500rpm. After 5 hours incubation at 37°C and 5% CO<sub>2</sub>, cells were  
723 washed once with 1xPBS containing 0.5% BSA (Roth) and 5mM EDTA (Roth). Shortly before  
724 flow cytometric analyses, 3µl Propidium Iodide (PI, BioLegend) was added to each tube.

725

## 726 **KIR genotyping**

727 KIR genotyping was carried out by sequence specific primer-polymerase chain reaction (PCR-  
728 SSP), as previously described(Uhrberg et al., 2002).

729

730

## 731 **ATAC sequencing**

732 ATACseq (assay for transposase-accessible chromatin using sequencing) was performed by  
733 sorting 5000 ILC1-like cells and CD56<sup>bright</sup> NK cells (see Fig. S1 for gating). The cells were  
734 centrifuged at 500xg for 5min at 4°C. The transposase reaction mix (2x transposase buffer,  
735 TDE1 enzyme (both from Illumina), 0.01% Digitonin (Promega)) was incubated for 30min at  
736 37°C with a rotation of 300rpm (Corces et al., 2016). The DNA was isolated using the Elute  
737 clean up kit according to manufacturer's protocol (Qiagen). The processed DNA was amplified  
738 and run on an Illumina HiSeq4000 instrument (paired-end 2x100 bp). Adapter detection was  
739 done using `detect_adapter.py` of the ENCODE-ATACseq-pipeline  
740 ([https://github.com/kundajelab/atac\\_dnase\\_pipelines](https://github.com/kundajelab/atac_dnase_pipelines)). Detected adaptors were finally trimmed  
741 using `cutadapt` (version 2.3; Martin, 2011). The results were mapped against the human  
742 genome (GRCh38, released 2014) using `bowtie2` (version 2.3.4.; Langmead, 2012).  
743 Afterwards, multi-mapping reads, duplicates and reads mapping against the mitochondrial  
744 DNA were detected and removed using `PICARD` (version  
745 2.20.2; <http://broadinstitute.github.io/picard/>) and `SAMtools` (version 1.9; Li et al., 2009). Due  
746 to the observation that Tn5 transposase binds as a dimer and inserts two adaptors separated by  
747 9 bp (Adey et al., 2010), a read-shifting-step was fulfilled using `alignmentSieve` of `deepTools`  
748 (Ramírez, 2016). Finally, peak-calling was done using `macs2` (`-f BAMPE -g hs --keep-dup all`  
749 `--cutoff-analysis`; Zhang et al., 2008). To visualize the results, browser tracks for the Genome  
750 Browser of the University of California, Santa Cruz (UCSC; <https://genome.ucsc.edu/>) were  
751 created by converting BAM- to BIGWIG-files using `bamCoverage` of `deepTools` (Ramírez,  
752 2016) and a normalization step of 1x effective genome size  
753 (<https://deeptools.readthedocs.io/en/latest/content/feature/effectiveGenomeSize.html>).

754

## 755 **RNA sequencing and data analysis**

756 After cell sorting, cells were stored in TRIzol<sup>TM</sup> Reagent (Invitrogen) and total RNA was  
757 extracted and fragmented. Reverse transcription and library production were carried out with  
758 an Illumina Truseq RNA preparation kit as described in the company's protocol. Sequencing of  
759 the libraries was performed with an Illumina HiSeq4000 (single-read 1x50bp). Sequence reads  
760 were mapped to the human genome (hg38) with `STAR` (version `STAR_2.5.0a`) and read counts  
761 of gene transcripts were determined using `gtf` file `Homo_sapiens.GRCH38.84.gtf` and  
762 `featureCount` (v1.5.0-p1). Analysis of differential gene transcription and normalization of read  
763 counts and PCA were performed with R package `DESeq2` (v.1.22.2). Four-way plots were  
764 generated with R package `vidger` (v.1.2.1).

765

## 766 **Statistical analyses**

767 All tests were performed with a parametric or nonparametric assumption (depending on normal  
768 distribution) and a 0.05 significance level. All analyses were done using the GraphPad Prism  
769 8.0.0 (GraphPad Software, San Diego, California USA, [www.graphpad.com](http://www.graphpad.com)).

770

## 771 **Data availability**

772 RNA sequencing and ATACseq data is accessible at NCBI Project ID: PRJNA594493  
773 (<http://www.ncbi.nlm.nih.gov/bioproject/594493>).

774

775

## 776 **Acknowledgements**

777 The authors thank the CB and PB donors for providing blood samples. This work was supported  
778 by funds from the Düsseldorf School of Oncology (funded by the Comprehensive Cancer  
779 Center Düsseldorf/Deutsche Krebshilfe and the Medical Faculty HHU Düsseldorf) and the  
780 Deutsche Forschungsgemeinschaft DFG SPP1937 (M.U.). The authors declare no competing  
781 financial interests.

782

## 783 **Competing interests**

784 The authors declare no competing interest.

785

## 786 **Bibliography:**

- 787 Bennstein, S.B., Manser, A.R., Weinhold, S., Scherenschlich, N., and Uhrberg, M. (2019).  
788 OMIP-055: Characterization of Human Innate Lymphoid Cells from Neonatal and Peripheral  
789 Blood. *Cytometry Part A* 0.
- 790 Bernink, J.H., Peters, C.P., Munneke, M., te Velde, A.A., Meijer, S.L., Weijer, K.,  
791 Hreggvidsdottir, H.S., Heinsbroek, S.E., Legrand, N., Buskens, C.J., *et al.* (2013). Human  
792 type 1 innate lymphoid cells accumulate in inflamed mucosal tissues. *Nat Immunol* 14, 221-  
793 229.
- 794 Bjorklund, A.K., Forkel, M., Picelli, S., Konya, V., Theorell, J., Friberg, D., Sandberg, R.,  
795 and Mjosberg, J. (2016). The heterogeneity of human CD127+ innate lymphoid cells revealed  
796 by single-cell RNA sequencing. *Nat Immunol* 17, 451-460.
- 797 Cella, M., Gamini, R., Sécca, C., Collins, P.L., Zhao, S., Peng, V., Robinette, M.L., Schettini,  
798 J., Zaitsev, K., Gordon, W., *et al.* (2019). Subsets of ILC3–ILC1-like cells generate a  
799 diversity spectrum of innate lymphoid cells in human mucosal tissues. *Nature Immunology*.
- 800 Cichocki, F., Grzywacz, B., and Miller, J.S. (2019). Human NK Cell Development: One Road  
801 or Many? *Frontiers in Immunology* 10.
- 802 Corces, M.R., Buenrostro, J.D., Wu, B., Greenside, P.G., Chan, S.M., Koenig, J.L., Snyder,  
803 M.P., Pritchard, J.K., Kundaje, A., Greenleaf, W.J., *et al.* (2016). Lineage-specific and single-  
804 cell chromatin accessibility charts human hematopoiesis and leukemia evolution. *Nature*  
805 *Genetics* 48, 1193.
- 806 Cortez, V.S., Ulland, T.K., Cervantes-Barragan, L., Bando, J.K., Robinette, M.L., Wang, Q.,  
807 White, A.J., Gilfillan, S., Cella, M., and Colonna, M. (2017). SMAD4 impedes the conversion  
808 of NK cells into ILC1-like cells by curtailing non-canonical TGF- $\beta$  signaling. *Nature*  
809 *immunology* 18, 995-1003.
- 810 Freud, A.G., Keller, K.A., Scoville, S.D., Mundy-Bosse, B.L., Cheng, S., Youssef, Y.,  
811 Hughes, T., Zhang, X., Mo, X., Porcu, P., *et al.* (2016). NKp80 defines a critical step during  
812 human natural killer cell development. *Cell reports* 16, 379-391.
- 813 Freud, A.G., Mundy-Bosse, B.L., Yu, J., and Caligiuri, M.A. (2017). The Broad Spectrum of  
814 Human Natural Killer Cell Diversity. *Immunity* 47, 820-833.
- 815 Freud, A.G., Yokohama, A., Becknell, B., Lee, M.T., Mao, H.C., Ferketich, A.K., and  
816 Caligiuri, M.A. (2006). Evidence for discrete stages of human natural killer cell  
817 differentiation in vivo. *The Journal of Experimental Medicine* 203, 1033-1043.
- 818 Fuchs, A., Vermi, W., Lee, J.S., Lonardi, S., Gilfillan, S., Newberry, R.D., Cella, M., and  
819 Colonna, M. (2013). Intraepithelial type 1 innate lymphoid cells are a unique subset of  
820 cytokine responsive interferon- $\gamma$ -producing cells. *Immunity* 38, 769-781.
- 821 Hoorweg, K., Peters, C.P., Cornelissen, F., Aparicio-Domingo, P., Papazian, N., Kazemier,  
822 G., Mjösberg, J.M., Spits, H., and Cupedo, T. (2012). Functional Differences between Human  
823 NKp44(-) and NKp44(+) RORC(+) Innate Lymphoid Cells. *Frontiers in Immunology* 3, 72.
- 824 Hosokawa, H., Romero-Wolf, M., Yang, Q., Motomura, Y., Levanon, D., Groner, Y., Moro,  
825 K., Tanaka, T., and Rothenberg, E.V. (2019). Cell type-specific actions of Bcl11b in early T-



- 826 lineage and group 2 innate lymphoid cells. *The Journal of Experimental Medicine*,  
827 *jem.20190972*.
- 828 Klein Wolterink, R.G.J., García-Ojeda, M.E., Vosshenrich, C.A.J., Hendriks, R.W., and Di  
829 Santo, J.P. (2010). The intrathymic crossroads of T and NK cell differentiation.  
830 *Immunological Reviews* 238, 126-137.
- 831 Krabbendam, L., Nagasawa, M., Spits, H., and Bal, S.M. (2018). Isolation of Human Innate  
832 Lymphoid Cells. *Current Protocols in Immunology* 122, e55.
- 833 Krämer, B., Goeser, F., Lutz, P., Glässner, A., Boesecke, C., Schwarze-Zander, C.,  
834 Kaczmarek, D., Nischalke, H.D., Branchi, V., Manekeller, S., *et al.* (2017). Compartment-  
835 specific distribution of human intestinal innate lymphoid cells is altered in HIV patients under  
836 effective therapy. *PLOS Pathogens* 13, e1006373.
- 837 Lim, A.I., Li, Y., Lopez-Lastra, S., Stadhouders, R., Paul, F., Casrouge, A., Serafini, N., Puel,  
838 A., Bustamante, J., Surace, L., *et al.* (2017). Systemic Human ILC Precursors Provide a  
839 Substrate for Tissue ILC Differentiation. *Cell* 168, 1086-1100.e1010.
- 840 Loyon, R., Jary, M., Salomé, B., Gomez-Cadena, A., Galaine, J., Kroemer, M., Romero, P.,  
841 Trabanelli, S., Adotévi, O., Borg, C., *et al.* (2019). Peripheral Innate Lymphoid Cells Are  
842 Increased in First Line Metastatic Colorectal Carcinoma Patients: A Negative Correlation  
843 With Th1 Immune Responses. *Frontiers in immunology* 10, 2121-2121.
- 844 Manser, A.R., Weinhold, S., and Uhrberg, M. (2015). Human KIR repertoires: shaped by  
845 genetic diversity and evolution. *Immunological Reviews* 267, 178-196.
- 846 Michel, T., Poli, A., Cuapio, A., Briquemont, B., Iserentant, G., Ollert, M., and Zimmer, J.  
847 (2016). Human CD56 bright NK Cells: An Update. *The Journal of Immunology* 196, 2923-  
848 2931.
- 849 Miller, J.S., McCullar, V., Punzel, M., Lemischka, I.R., and Moore, K.A. (1999). Single  
850 Adult Human CD34+Lin-CD38- Progenitors Give Rise to Natural Killer Cells, B-Lineage  
851 Cells, Dendritic Cells, and Myeloid Cells. *Blood* 93, 96-106.
- 852 Mjösberg, J.M., Trifari, S., Crellin, N.K., Peters, C.P., van Drunen, C.M., Piet, B., Fokkens,  
853 W.J., Cupedo, T., and Spits, H. (2011). Human IL-25- and IL-33-responsive type 2 innate  
854 lymphoid cells are defined by expression of CCR2 and CD161. *Nature Immunology* 12,  
855 1055.
- 856 Nagasawa, M., Germar, K., Blom, B., and Spits, H. (2017). Human CD5+ Innate Lymphoid  
857 Cells Are Functionally Immature and Their Development from CD34+ Progenitor Cells Is  
858 Regulated by Id2. *Frontiers in Immunology* 8.
- 859 Oo, Y.H., and Adams, D.H. (2010). The role of chemokines in the recruitment of  
860 lymphocytes to the liver. *Journal of Autoimmunity* 34, 45-54.
- 861 Park, E., Patel, S.J., Wang, Q., Andhey, P.S., Zaitsev, K., Porter, S.I., Hershey, M.L., Bern,  
862 M.D., Plougastel-Douglas, B., Collins, P.L., *et al.* (2019). *Toxoplasma gondii* Infection  
863 Drives Conversion of NK Cells into ILC1s. *bioRxiv*, 642017.
- 864 Phillips, J.H., Hori, T., Nagler, A., Bhat, N., Spits, H., and Lanier, L.L. (1992). Ontogeny of  
865 human natural killer (NK) cells: fetal NK cells mediate cytolytic function and express  
866 cytoplasmic CD3 epsilon,delta proteins. *The Journal of experimental medicine* 175, 1055-  
867 1066.
- 868 Pikovskaya, O., Chaix, J., Rothman, N.J., Collins, A., Chen, Y.-H., Scipioni, A.M., Vivier, E.,  
869 and Reiner, S.L. (2016). Cutting Edge: Eomesodermin Is Sufficient To Direct Type 1 Innate  
870 Lymphocyte Development into the Conventional NK Lineage. *The Journal of Immunology*  
871 196, 1449-1454.
- 872 Radtke, F., MacDonald, H.R., and Tacchini-Cottier, F. (2013). Regulation of innate and  
873 adaptive immunity by Notch. *Nature Reviews Immunology* 13, 427-437.
- 874 Renoux, Virginie M., Zriwil, A., Peitzsch, C., Michaeëlsson, J., Friberg, D., Soneji, S., and  
875 Sitnicka, E. (2015). Identification of a Human Natural Killer Cell Lineage-Restricted  
876 Progenitor in Fetal and Adult Tissues. *Immunity* 43, 394-407.

- 877 Roan, F., Stoklasek, T.A., Whalen, E., Molitor, J.A., Bluestone, J.A., Buckner, J.H., and  
878 Ziegler, S.F. (2016). CD4+ group 1 innate lymphoid cells form a functionally distinct ILC  
879 subset that is increased in systemic sclerosis. *Journal of immunology (Baltimore, Md : 1950)*  
880 *196*, 2051-2062.
- 881 Salomé, B., Gomez-Cadena, A., Loyon, R., Suffiotti, M., Salvestrini, V., Wyss, T., Vanoni,  
882 G., Ruan, D.F., Rossi, M., Tozzo, A., *et al.* (2019). CD56 as a marker of an ILC1-like  
883 population with NK cell properties that is functionally impaired in AML. *Blood Advances* *3*,  
884 3674-3687.
- 885 Schmitt, T.M., and Zúñiga-Pflücker, J.C. (2002). Induction of T Cell Development from  
886 Hematopoietic Progenitor Cells by Delta-like-1 In Vitro. *Immunity* *17*, 749-756.
- 887 Scoville, S.D., Freud, A.G., and Caligiuri, M.A. (2017). Modeling Human Natural Killer Cell  
888 Development in the Era of Innate Lymphoid Cells. *Frontiers in immunology* *8*, 360-360.
- 889 Spits, H., Artis, D., Colonna, M., Diefenbach, A., Di Santo, J.P., Eberl, G., Koyasu, S.,  
890 Locksley, R.M., McKenzie, A.N.J., Mebius, R.E., *et al.* (2013). Innate lymphoid cells -a  
891 proposal for uniform nomenclature. *Nat Rev Immunol* *13*, 145-149.
- 892 Trabanelli, S., Gomez-Cadena, A., and Jandus, C. (2019). Immunophenotyping of Human  
893 Innate Lymphoid Cells. In *Immunophenotyping: Methods and Protocols*, J.J.P. McCoy, ed.  
894 (New York, NY: Springer New York), pp. 179-192.
- 895 Uhrberg, M., Parham, P., and Wernet, P. (2002). Definition of gene content for nine common  
896 group B haplotypes of the Caucasoid population: KIR haplotypes contain between seven and  
897 eleven KIR genes. *Immunogenetics* *54*, 221-229.
- 898 Vely, F., Barlogis, V., Vallentin, B., Neven, B., Piperoglou, C., Ebbo, M., Perchet, T., Petit,  
899 M., Yessaad, N., Touzot, F., *et al.* (2016). Evidence of innate lymphoid cell redundancy in  
900 humans. *Nat Immunol* *17*, 1291-1299.
- 901 Vivier, E., Artis, D., Colonna, M., Diefenbach, A., Di Santo, J.P., Eberl, G., Koyasu, S.,  
902 Locksley, R.M., McKenzie, A.N.J., Mebius, R.E., *et al.* (2018). Innate Lymphoid Cells: 10  
903 Years On. *Cell* *174*, 1054-1066.
- 904 Wang, H., Pierce, L.J., and Spangrude, G.J. (2006). Distinct roles of IL-7 and stem cell factor  
905 in the OP9-DL1 T-cell differentiation culture system. *Experimental hematology* *34*, 1730-  
906 1740.
- 907 Yudanin, N.A., Schmitz, F., Flamar, A.-L., Thome, J.J.C., Tait Wojno, E., Moeller, J.B.,  
908 Schirmer, M., Latorre, I.J., Xavier, R.J., Farber, D.L., *et al.* (2019). Spatial and Temporal  
909 Mapping of Human Innate Lymphoid Cells Reveals Elements of Tissue Specificity.  
910 *Immunity*.
- 911 Zhao, X., Weinhold, S., Brands, J., Hejazi, M., Degistirici, Ö., Kögler, G., Meisel, R., and  
912 Uhrberg, M. (2018). NK cell development in a human stem cell niche: KIR expression occurs  
913 independently of the presence of HLA class I ligands. *Blood Advances* *2*, 2452-2461.
- 914 Zúñiga-Pflücker, J.C. (2004). T-cell development made simple. *Nature Reviews Immunology*  
915 *4*, 67.
- 916

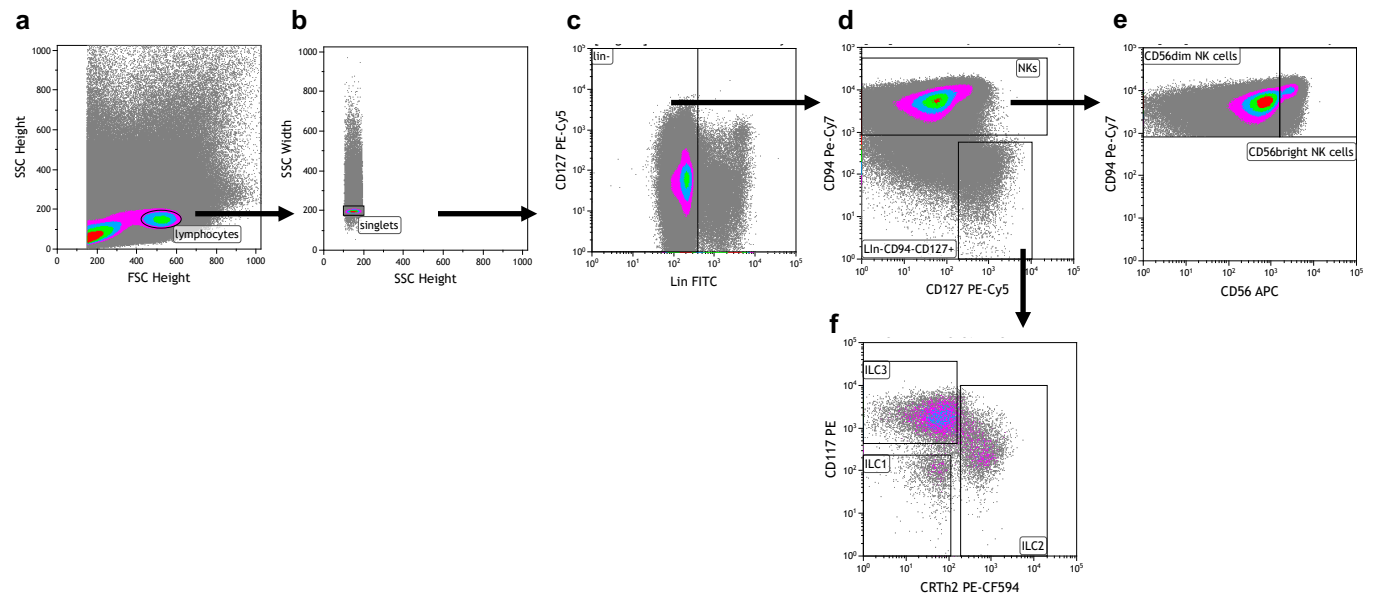

**Figure S1 | Exemplary gating strategy for ILC and NK cell sorting.** Before sorting, CB MNCs were depleted of unwanted cell populations (via biotinylated CD3, CD66b, CD14, CD19 antibodies). **(a)** Lymphocytes were identified using the forward (FSC-H) and side scatter (SSC-H). **(b)** Doublets were excluded using the width side scatter (SSC-W). **(c)** Lineage (Lin) positive cells were excluded using CD127 and lineage panel mix in FITC. **(d)** The Lin<sup>-</sup> cells were further divided into NK cells and ILCs via CD94 (for NK cells) and CD127 (for ILCs) expression. **(e)** CD94<sup>+</sup> NK cells are further separated into CD56<sup>bright</sup> and CD56<sup>dim</sup> NK cells via their different expression levels of CD56. **(f)** ILCs are separated into ILC1 (CD117<sup>-</sup>CRTH2<sup>-</sup>), ILC2 (CD117<sup>+/+</sup>CRTH2<sup>+</sup>), and ILC3 (CD117<sup>+</sup>CRTH2<sup>-</sup>) using CD117 and CRTH2 expression. Antibodies included in the Lin panel: anti-CD3, anti-CD14, anti-CD19, anti-CD34, anti-CD20, anti-BDCA-2, anti-TCR $\alpha\beta$ , anti-TCR $\gamma\delta$ , anti-CD1a, anti-CD123, anti-CD66b, anti-CD235a, anti-Fc $\epsilon$ R1 $\alpha$ .

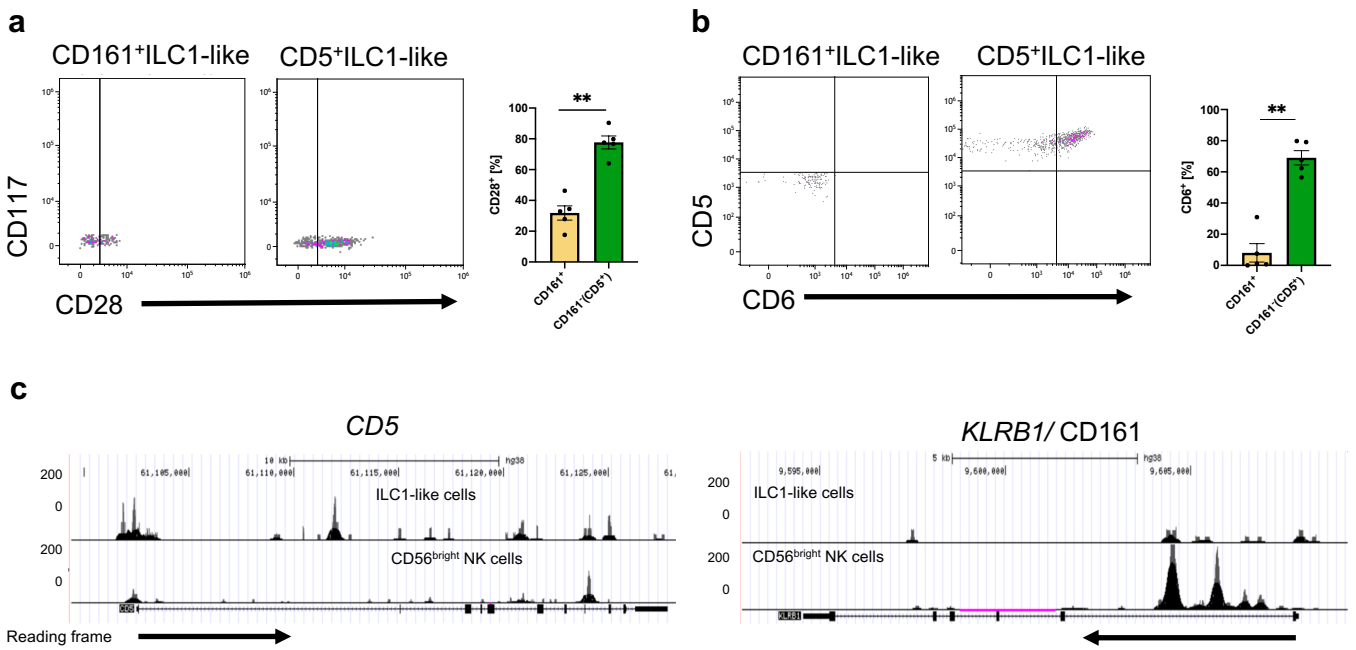

**Figure S2 |CD161<sup>+</sup>ILC1-like cells and CD5<sup>+</sup>ILC1-like cells differ in their CD28 and CD6 expression.** CB MNCs were stained, gated on ILC1-like cells, and further gated on CD161<sup>+</sup>ILC1-like cells and CD5<sup>+</sup>ILC1-like cells. Representative dot plots and quantification of **(a)** CD28 and **(b)** CD6 expression in CD5<sup>+</sup> and CD161<sup>+</sup>ILC1-like cells. **(c)** Comparative analysis of regions with open chromatin by ATACseq for *CD5* and *KLRB1* (CD161). For ATAC sequencing, 5000 CB-derived ILC1-like (top row) and CD56<sup>bright</sup> NK cells (bottom row) were flow cytometrically sorted to >99% purity (n=1). Arrows underneath the ATAC data indicate orientation and start of gene transcription. The heights of the bars represent the mean ± SEM. Levels of significance were calculated with an unpaired t test (Mann Whitney U), \* p-value < 0.05, \*\* p-value < 0.005. Data points represent at least three individual donors and experiments.

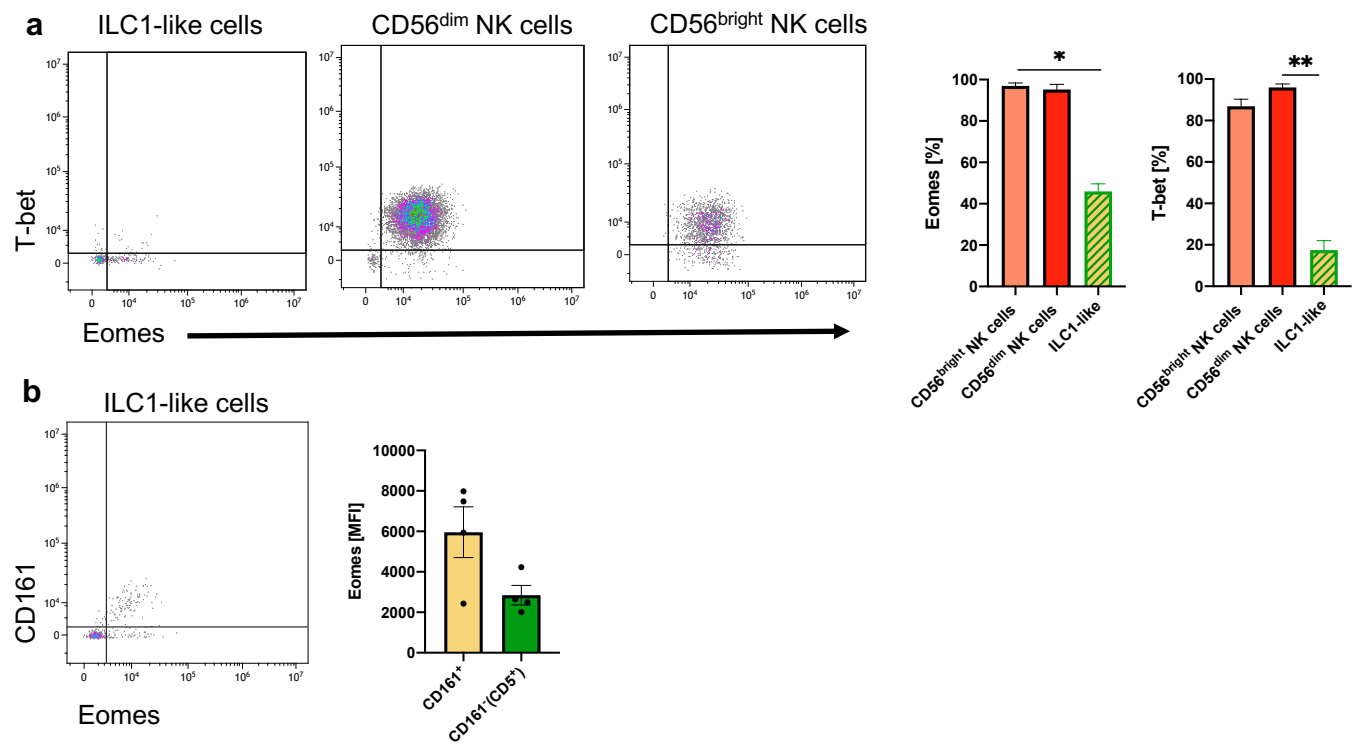

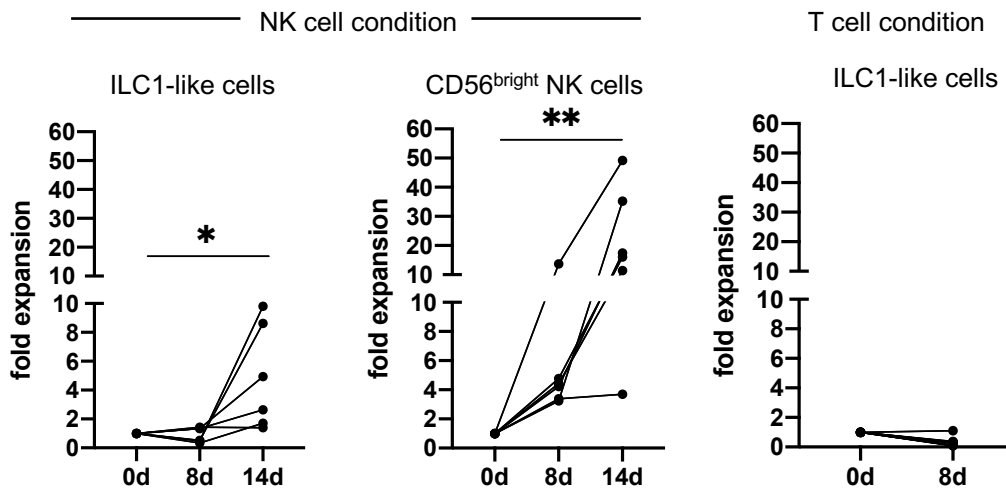

**Figure S4 | ILC-1-like cells proliferate in NK cell but not T cell conditions.** Expansion of ILC1-like cells (left) and CD56<sup>bright</sup> NK cells (middle) in NK cell conditions and expansion of ILC1-like cells in T cell conditions (right). Dots represent the individual fold change calculated by dividing the cell count at day 8 or 14 by the initial cell count (n=6 for NK condition, n=4 for T cell condition). \* p-value < 0.05, \*\* p-value < 0.01. Data points represent at least three different donors and experiments.

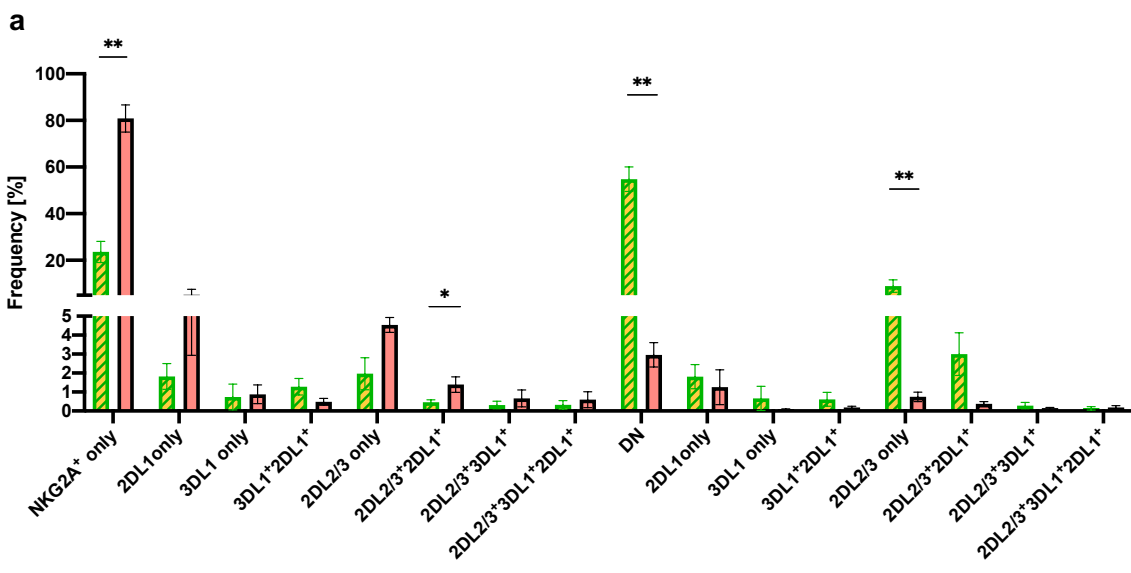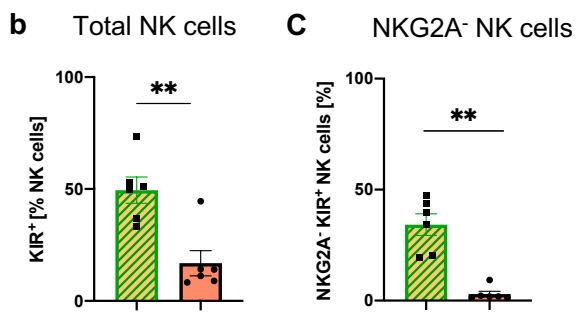

▨ ILC1-like-derived NK cells  
■ CD56<sup>bright</sup>-derived NK cells

**Figure S5 | NK cell receptor repertoires at day 8.** (a) NK cell receptor repertoires developed from CD56<sup>bright</sup> NK cells and ILC1-like cells, respectively at day 8, (n=6). (b) KIR<sup>+</sup> and (c) KIR<sup>+</sup>NKG2A<sup>-</sup> frequencies within NK cells derived from CB CD56<sup>bright</sup> NK cells and CB ILC1-like cells at day 8 (n=6). Heights of the bars represent mean ± SEM. Levels of significance were calculated with an unpaired t test (Mann Whitney U). Data represents two independent experiments. \* p-value < 0.05, \*\* p-value < 0.01. Data points represent individual donors from at least three experiments (see Figure S6 for individual KIR repertoires).

**a** ILC1-like-derived NK cells day 8

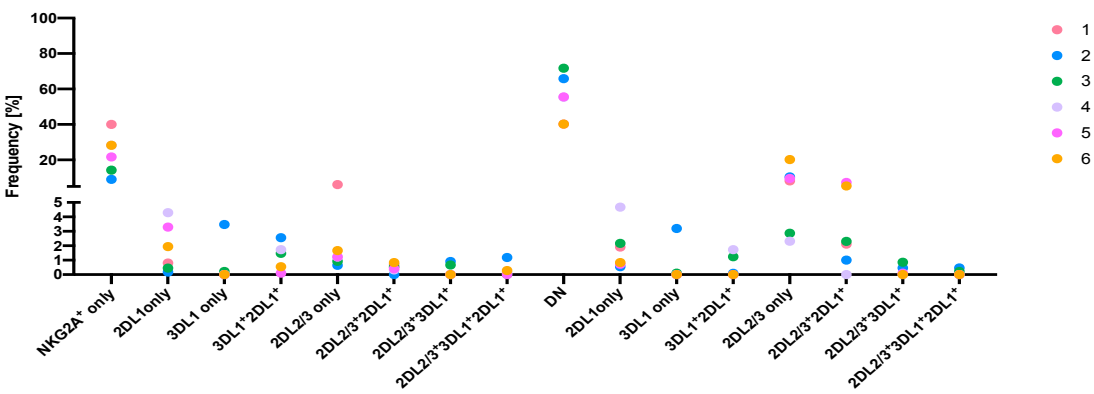

**b** ILC1-like-derived NK cells day 14

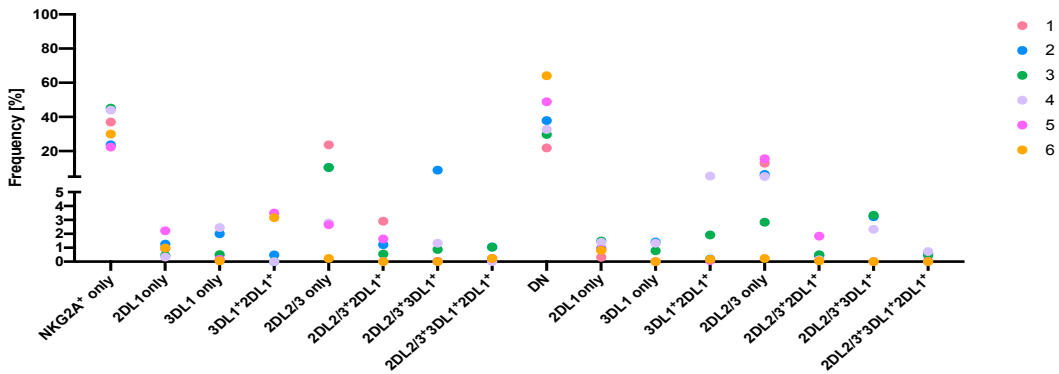

**c** CD56<sup>bright</sup>-derived NK cells day 8

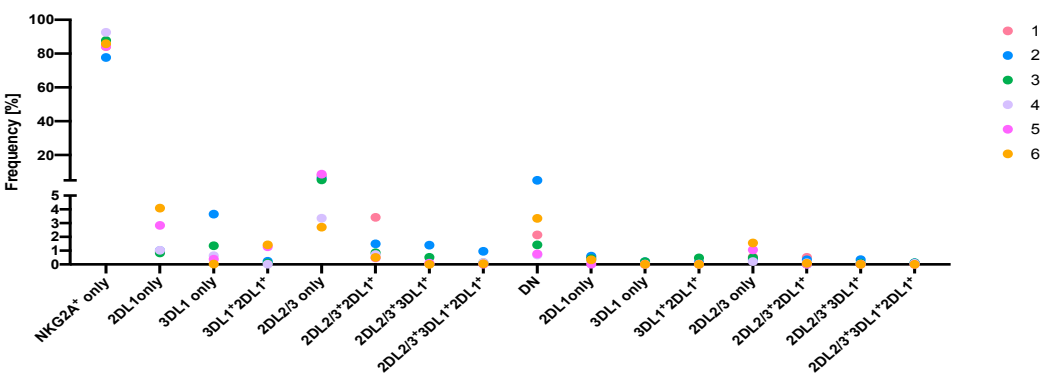

**d** CD56<sup>bright</sup>-derived NK cells day 14

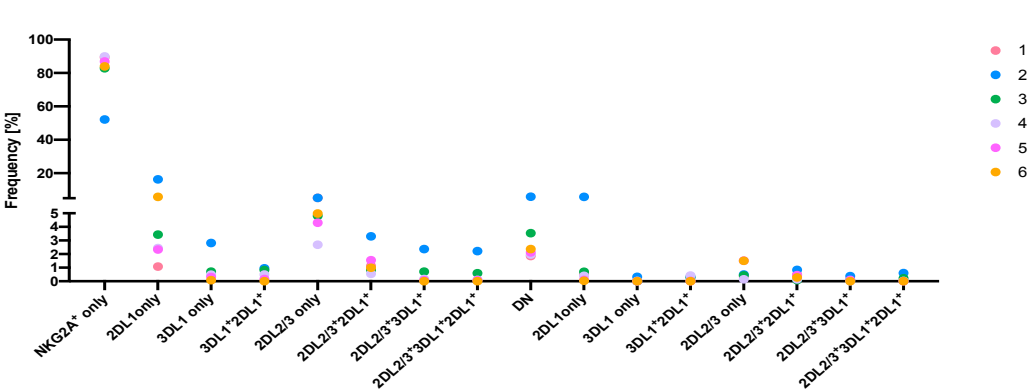

**Figure S6 | Individual NK cell receptor repertoires after 8 and 14 days of co-culture on OP9-DL1. (a-d)** Individual NK cell receptor repertoires encompassing NKG2A, KIR2DL1, KIR2DL2, KIR2DL3, and KIR3DL1 receptors after 8 and 14 days of OP9-DL1 co-culture, respectively from ILC1-like- and CD56<sup>bright</sup> derived NK cells for the same 6 CB donors shown in Fig. 7 and Fig. S5. Of note, CB donor 1 does not have an 3DL1 allele. Data points represent individual donors from at least three experiments.



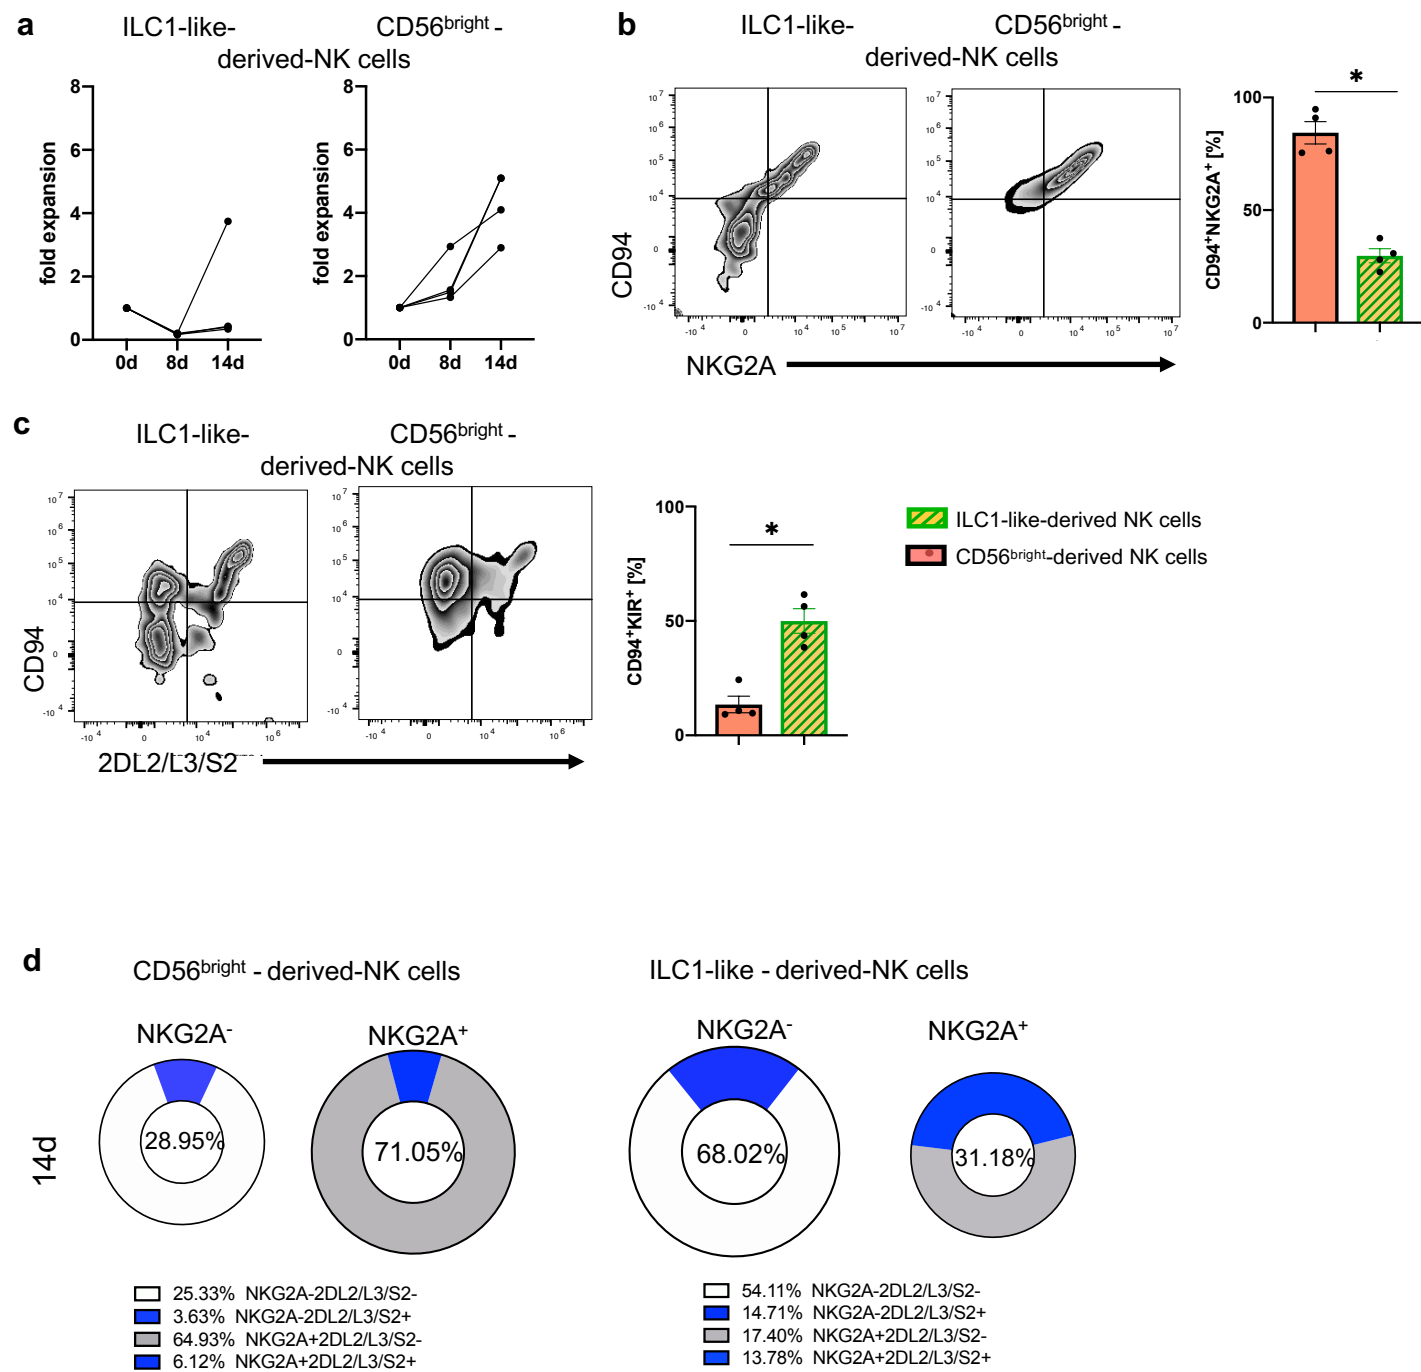

**Figure S7 | ILC1-like cells from PB have NKP potential.** Bulk sorted PB ILC1-like cells were cultured for 14d on OP9-DL1 in similar conditions as used for CB (see Figure 5A). **(a)** Expansion of NK cells differentiated from PB-derived ILC1-like cells and CD56<sup>bright</sup> NK cells, respectively. Exemplary density plots and frequencies of expanded NK cells are shown for **(b)** CD94 and NKG2A and **(c)** NKG2A and KIR2DL2/L3/S2, derived from PB ILC1-like cells and PB CD56<sup>bright</sup> NK cells, respectively. **(d)** Pie charts displaying the combinatorial expression of NKG2A and KIR2DL2/L3/S2 with the respective frequencies indicated below. The heights of the bars represent the mean  $\pm$  SEM. Levels of significance were calculated by a Mann-Whitney test, (n=4). \* p-value < 0.05. Data represents four different donors from two individual experiments.
